1  
2  
3  
4  
5  
6  
7  
8  
9  
10  
11  
12  
13  
14  
15  
16  
17  
18  
19  
20  
21  
22  
23

Glycosylation-associated dysregulation of pyocyanin production in *Pseudomonas aeruginosa*: Implications for quorum sensing regulation

Anna K. McClinton<sup>2,3</sup>, Caleb L. Hamilton<sup>4</sup>, Donna L. Cioffi<sup>1,2¶\*</sup>, Eugene A. Cioffi<sup>2,3¶</sup>

Departments of <sup>1</sup>Biochemistry and Molecular Biology, <sup>2</sup>Center for Lung Biology,

<sup>3</sup>Pharmacology; University of South Alabama, Mobile, AL

<sup>4</sup>Department of Biological and Environmental Sciences; Troy University, Montgomery AL.

\*Donna L. Cioffi, PhD

Email: [dlcioffi@southalabama.edu](mailto:dlcioffi@southalabama.edu)

¶ These authors contributed equally to this work

24  
25  
26

## Abstract

27           *Pseudomonas aeruginosa* (*P. aeruginosa*) is an important opportunistic pathogen  
28 associated with high mortality in pneumonia, sepsis, and cystic fibrosis. Lending to its  
29 ability to cause severe disease and death is its arsenal of virulence factors and host  
30 evasion tactics. In addition to various other regulatory systems, many of *P.*  
31 *aeruginosa*'s virulence factors are regulated by a population density dependent  
32 regulatory network known as quorum sensing (QS). Many regulatory systems are  
33 impacted by post-translational modifications of proteins. An underexplored physiological  
34 aspect of *P. aeruginosa* is its ability to glycosylate proteins and the subsequent impact  
35 of glycosylation on *P. aeruginosa* physiology and behavior. The goal of this study was to  
36 determine whether *P. aeruginosa* QS is regulated by glycosylation. Here we  
37 demonstrate that disruption of glycosylation dysregulates QS phenotypes, notably  
38 pyocyanin production, in *P. aeruginosa* PAO1. In this study, it was initially observed  
39 that deletion of the *P. aeruginosa* neuraminidase, PaNA, caused an increased  
40 production of pyocyanin in LB-Lennox broth compared to wildtype bacteria at identical  
41 population densities. To confirm that the increased pyocyanin production was due to  
42 QS, we performed induction experiments using 10% cell-free media harvested from  
43 overnight cultures. To determine whether the QS phenotype observed is specific to  
44 pseudaminic acid, the target of PaNA, or if it is a reflection of global changes in  
45 glycosylation, we measured QS in a library of mutant bacteria generated in an MPAO1  
46 background containing transposon insertions in various glycosyl-associated enzymes.

- 47 The pattern of dysregulated QS held true in these mutant strains as well. Overall these
- 48 data indicate that in *P. aeruginosa*, glycosylation is an important determinant of QS.

50 Introduction

51 *P. aeruginosa* is a gram-negative bacteria, found ubiquitously in the soil and  
52 water[1, 2]. It is well suited to exploiting a broad range of environments including  
53 human hosts. In humans, *P. aeruginosa* is associated with acute conditions such as  
54 burn wound infections, eye infections, and ventilator-associated pneumonia and sepsis,  
55 as well as chronic infections of the cystic fibrosis lung. Despite its being an  
56 opportunistic pathogen, *P. aeruginosa* can cause severe and fatal infections. *P.*  
57 *aeruginosa* infection is multifactorial as the bacteria possess a plethora of virulence  
58 factors. An aspect of the multifactorial virulence of *P. aeruginosa* is that the regulation  
59 of virulence factors is highly complex and multi-layered[2]. One of the layers, quorum  
60 sensing (QS), is accountable for the control of several hundred genes, many of which  
61 relate to virulence[3]. QS is a phenomenon of bacterial communication and coordination  
62 which is traditionally defined as dependent on population density, whereby when a small  
63 molecule, generated at a steady rate corresponding with population density, is  
64 accumulated at sufficient quantities, a complex regulatory cascade is triggered in the  
65 population controlling the expression and repression of several hundred genes[4, 5].  
66 This complex autoinduction system has at least three separate, yet interdependent  
67 arms: the Las system, the Rhl system and the PQS system[5-7]. Each of these systems  
68 is complex and capable of cross-talk[7-9]. QS is one example of *P. aeruginosa*  
69 responding to its external environment and the regulation of this phenomenon is  
70 dynamic and complex. A number of upstream signal transduction systems have been  
71 implicated in the regulation of quorum sensing[10-13]. One post-translational  
72 modification that is unexplored in QS regulation is glycosylation.

73           Signal transduction occurs across the bacterial membrane, as does  
74 glycosylation[13, 14]. Glycosylation is the covalent attachment of a glycan, or  
75 carbohydrate chain, to a substrate such as a protein or a lipid[15, 16]. While protein  
76 glycosylation was previously viewed as a eukaryotic process, it is now recognized as a  
77 process that occurs across all domains of life[16]. In *P. aeruginosa*, only a few proteins  
78 have been identified as glycosylated and these modifications do not necessarily occur in  
79 all strains[17]. Known examples of glycosylation in *P. aeruginosa* include the flagella,  
80 pili, and LecB lectin[14, 17-28]. While much remains unknown concerning protein  
81 glycosylation in *P. aeruginosa*, a great deal has been elucidated concerning lipid  
82 glycosylation. Interestingly, the biosynthetic pathways of LPS correlate or even overlap  
83 with the few known pathways of protein glycosylation[29-31]. The majority of the  
84 enzymes involved in LPS biosynthesis have been characterized, however,  
85 uncharacterized enzymes predicted to be glycosyltransferases remain [29, 30]. In this  
86 study we observed an altered QS phenotype in a small library of bacteria carrying  
87 transposon insertions in various, “probable” glycosyl-associated enzymes[32-34],  
88 providing a link between glycosylation and QS. These glycosyl-associated enzymes  
89 encompass glycosyl hydrolases which would be responsible for removing  
90 carbohydrates from a glycan chain by hydrolysis as well as glycosyl-transferases which  
91 add to individual carbohydrates to glycan chains.

92           An interesting carbohydrate found in eukaryotes and bacteria is sialic acid. Sialic  
93 acids are any of the 9 carbon,  $\alpha$ -keto sugars derived from neuraminic acid[35]. Sialic  
94 acids often occur as the terminal sugar of the carbohydrate branches of glycans[36]. A  
95 specialized sialic acid-like sugar known as pseudaminic acid is found in some bacteria

96 and has been identified as a component of the glycan found on pilin of some strains of  
97 *P. aeruginosa*. Pseudaminic acid has been found decorating the flagella of several other  
98 gram negative bacteria, as well[37]. Additionally, pseudaminic acid has been found as  
99 component of LPS in a variety of gram negative bacteria and in a few strains of *P.*  
100 *aeruginosa*[37-43]. Sialic acids are cleaved from the underlying glycan by a class of  
101 enzymes referred to as sialidases or neuraminidases[44]. *P. aeruginosa* PAO1  
102 possesses an enzyme initially identified as a neuraminidase, but following X-ray  
103 crystallography and *in silico* docking experiments, the enzyme was determined to be a  
104 pseudaminidase[45, 46]. This enzyme, PaNA, is encoded at locus PA2794 and was  
105 initially of interest as a virulence factor. However, its role in the biology of the bacteria  
106 remains uncharacterized[36, 44].

107         A strain of *P. aeruginosa* PAO1 from which the neuraminidase gene PA2794 has  
108 been deleted[44], PAO1 $\Delta$ 2794, exhibited a pronounced over-expression of pyocyanin,  
109 which is associated with the PQS arm of QS, compared to the wildtype strain. We  
110 therefore hypothesized that the deletion of the neuraminidase resulted in an alteration of  
111 the glycosylation of one or more proteins which led to this anomalous phenotype.  
112 Indeed, lectin blots revealed a differential pattern of glycosylation between the wildtype  
113 strain and the mutant  $\Delta$ 2794. We confirmed our initial observations by using a different  
114 PaNA mutant, PW5679, generated in MPAO1 by transposon insertion. To determine  
115 whether the QS phenotype observed is specific to pseudaminic acid, the target of  
116 PaNA, or if it is a reflection of global changes in glycosylation, we measured QS in a  
117 library of mutant bacteria generated in an MPAO1 background containing transposon  
118 insertions in various glycosyl-associated enzymes. The pattern of dysregulated QS held

119 true in these mutant strains as well. We show that disruption of PaNA, as well as other  
120 glycosyl-associated enzymes, results in a QS phenotype—namely the over-production  
121 of pyocyanin—which is decoupled from population density, overall suggesting that  
122 bacterial glycosylation is a critical determinant of QS.

123

124

## 125 Materials & Methods

126 *Bacterial Strains and Growth Conditions:* Table I presents the strains utilized in this  
127 study. Strains were routinely grown in LB-Lennox broth (Sigma-Aldrich; Darmstadt,  
128 Germany) and/or agar plates (BD Difco; Franklin Lakes, NJ). Freezer stocks were  
129 maintained in nutrient broth (BD Difco) with 12.5% glycerol (Sigma) at -80°C. Overnight  
130 cultures of the transposon mutants were grown in the presence of tetracycline.

131

132 Table 1.

| <b>Strain Name</b> | <b>Description</b>                                                                                              | <b>Source</b>                                                          |
|--------------------|-----------------------------------------------------------------------------------------------------------------|------------------------------------------------------------------------|
| <b>PAO1</b>        | Wildtype                                                                                                        | (Soong et al., 2006)                                                   |
| <b>PAO1Δ2794</b>   | Allelic deletion of PA2794<br>Constructed in PAO1<br>background<br>Disruption of Pseudaminidase<br>gene         | (Soong et al., 2006)                                                   |
| <b>PW2532</b>      | PA0842-D03::ISlacZ/hah<br>Constructed in MPAO1<br>background<br>Disruption of a probable<br>glycosyltransferase | (Held, Ramage, Jacobs, Gallagher, & Manoil, 2012; Jacobs et al., 2003) |
| <b>PW2834</b>      | PA1014-G02::ISlacZ/hah<br>Constructed in MPAO1<br>background<br>Disruption of a probable<br>glycosyltransferase | (Held et al., 2012; Jacobs et al., 2003)                               |

|               |                                                                                                                        |                                          |
|---------------|------------------------------------------------------------------------------------------------------------------------|------------------------------------------|
| <b>PW3519</b> | PA1385-F08::ISlacZ/hah<br>Constructed in MPAO1<br>background<br>Disruption of a probable<br>glycosyltransferase        | (Held et al., 2012; Jacobs et al., 2003) |
| <b>PW3525</b> | PA1389-E07::ISlacZ/hah<br>Constructed in MPAO1<br>background<br>Disruption of a probable<br>glycosyltransferase        | (Held et al., 2012; Jacobs et al., 2003) |
| <b>PW3528</b> | PA1390-H10::ISphoA/hah<br>Constructed in MPAO1<br>background<br>Disruption of a probable<br>glycosyltransferase        | (Held et al., 2012; Jacobs et al., 2003) |
| <b>PW3531</b> | PA1391-B01::ISlacZ/hah<br>Constructed in MPAO1<br>background<br>Disruption of a probable<br>glycosyltransferase        | (Held et al., 2012; Jacobs et al., 2003) |
| <b>PW4697</b> | PA2160-G04::ISlacZ/hah<br>Constructed in MPAO1<br>background<br>Disruption of a probable<br>glycosyl hydrolase         | (Held et al., 2012; Jacobs et al., 2003) |
| <b>PW4699</b> | PA2162-G09::ISlacZ/hah<br>Constructed in MPAO1<br>background<br>Disruption of a probable<br>glycosyl hydrolase         | (Held et al., 2012; Jacobs et al., 2003) |
| <b>PW4702</b> | PS2164-C10::ISlacZ/hah<br>Constructed in MPAO1<br>background<br>Disruption of a probable<br>glycosyl hydrolase         | (Held et al., 2012; Jacobs et al., 2003) |
| <b>PW4801</b> | PA2233-H07::ISlacZ/hah<br>Constructed in MPAO1<br>background<br>Disruption of a probable<br>glycosyltransferase (PsIC) | (Held et al., 2012; Jacobs et al., 2003) |
| <b>PW5679</b> | PA2794-G06::ISlacZ/hah<br>Constructed in MPAO1<br>background<br>Disruption of Pseudaminidase<br>gene                   | (Held et al., 2012; Jacobs et al., 2003) |
| <b>PW6130</b> | pelF-F08::ISphoA/hah<br>Constructed in MPAO1<br>background<br>Disruption of a PA3059, PelF,                            | (Held et al., 2012; Jacobs et al., 2003) |



---

| cytosolic glycosyltransferase |                                                                                                                  |                                          |
|-------------------------------|------------------------------------------------------------------------------------------------------------------|------------------------------------------|
| <b>PW9106</b>                 | PA4819-A03::ISphoA/hah<br>Constructed in MPAO1<br>background<br>Disruption of a probable<br>glycosyltransferase  | (Held et al., 2012; Jacobs et al., 2003) |
| <b>PW7022</b>                 | ArnC-H11::ISlacZ/hah<br>Constructed in MPAO1<br>background<br>Disruption of PA3553, ArnC,<br>glycosyltransferase | (Held et al., 2012; Jacobs et al., 2003) |
| <b>PW3601</b>                 | LasI-F07::ISlacZ/hah<br>Constructed in MPAO1<br>background<br>Disruption of PA1432, LasI                         | (Held et al., 2012; Jacobs et al., 2003) |
| <b>PW3598</b>                 | LasR-C01::ISlacZ/hah<br>Constructed in MPAO1<br>background<br>Disruption of PA1430, LasR                         | (Held et al., 2012; Jacobs et al., 2003) |
| <b>PW6880</b>                 | RhII-D03::ISphoA/hah<br>Constructed in MPAO1<br>background<br>Disruption of PA3476, RhII                         | (Held et al., 2012; Jacobs et al., 2003) |
| <b>PW6882</b>                 | RhIR-B10::ISlacZ/hah<br>Constructed in MPAO1<br>background<br>Disruption of PA347, RhIR                          | (Held et al., 2012; Jacobs et al., 2003) |
| <b>PW2812</b>                 | MvfR-G11::ISlacZ/hah<br>Constructed in MPAO1<br>background<br>Disruption of PA1003, mvfR                         | (Held et al., 2012; Jacobs et al., 2003) |
| <b>MPAO1</b>                  | Wildtype (background for<br>transposon mutants)                                                                  | (Held et al., 2012; Jacobs et al., 2003) |

---

133

134 *Growth Curves:* Growth curves were conducted by inoculating 100 ml of sterile LB broth

135 with 1 ml of overnight cultures. Cultures were grown at 37°C with shaking at 260 rpm.

136 Optical Density at 600nm (OD600) was measured over the prescribed time course.

137 Culture supernatant was removed and stored at -20°C for pyocyanin measurements.

138 Pellets for use in lectin blots were stored at -80°C.

139

140 *Induction Bioassay:* Bacteria were grown overnight (14-18 hours) in 100 ml of sterile LB  
141 broth with 1 ml of overnight cultures. Cultures were grown at 37°C with shaking at 260  
142 rpm. Supernatant was harvested by two centrifugations of 45 minutes at 4000 rpm. The  
143 first centrifugation pelleted the bacteria, and the supernatant was transferred to fresh 50  
144 ml conical tubes for the second centrifugation to clarify the supernatant further. The  
145 clarified supernatant was filter sterilized using 0.2 µm PES filters (Thermo Fisher  
146 Scientific; Waltham, MA). The filtrates were then aliquoted and stored at -20°C.  
147 Filtrates were thawed at 4°C overnight for use in the induction broth. Induction broth  
148 was prepared by adding 10% cell-free supernatant to naïve LB broth to a total volume of  
149 100 ml. Prior to inoculation with 1 ml of overnight culture, 1 ml aliquots were taken from  
150 each flask to be utilized as a blank for pyocyanin measurements.

151

152 *Pyocyanin Measurement:* Pyocyanin was measured over the course of the growth  
153 curves by collecting 4 ml aliquots and centrifuging at 4000 rpm for 20 minutes. The  
154 clarified supernatant was stored at -20°C. Pyocyanin was measured in clear 96-well  
155 Costar plates (Corning, Corning, NY) at an absorbance of 655 nm.

156

157 *Rhamnolipid Assessment:* Swarming behavior was assayed as an indicator of  
158 rhamnolipid production. Swarm plates were poured at an agar concentration of 0.6%  
159 and allowed to equilibrate overnight at room temperature. Swarm plates were  
160 inoculated using sterile wooden picks and incubated inverted at 37°C in a humidified  
161 chamber overnight. Images of the plates were acquired and colonies outlined using  
162 ImageJ. The measurements were normalized to the area of the plate.

163

164 *Measurement of LasB Production:* Skim-milk plates were utilized to assess LasB  
165 production. Skim-milk plates were poured by adding 20% sterile skim-milk to sterile,  
166 molten nutrient agar[47]. Plates were inoculated using sterile wooden picks and  
167 incubated, inverted at 37°C overnight. Images were acquired, and ImageJ was used to  
168 measure the area of the colonies and the area of the cleared zone surrounding the  
169 colonies. The measurements were normalized to the area of the plate and reported as  
170 the ratio of the zone to the colony.

171

172 *Lectin blots:* Lectin blots were conducted on lysates from bacterial pellets harvested  
173 and stored at -80°C. Lysates were prepared as previously described[14] with  
174 modification, namely Triton-X (Sigma) was used in place of lysozyme. Protein was  
175 measured in the lysates using the BCA kit from Pierce (Thermo Fisher Scientific).  
176 Lysates were stored at -20°C. Lectin blots were performed by transferring the proteins  
177 to nitrocellulose membrane following SDS-PAGE in a 4-12% NuPAGE gel (Thermo  
178 Fisher Scientific). Ponceau staining of the membrane was performed to confirm equal  
179 protein loading. Membranes were blocked in 1X Carbofree buffer (Vector Laboratories;  
180 Burlingame, CA). Lectin reactivity was assessed with biotinylated Lotus lectin (Vector)  
181 was along with Streptavidin, DyLight 488 (Thermo Fisher Scientific). Endogenous  
182 biotinylation was assessed using a Streptavidin alone control.

183

184 *Statistical Analysis:* Data sets were analyzed using Prism6 Graphpad. Where  
185 appropriate, Two-way ANOVA was utilized with multiple comparisons with no matching

186 and Fisher's LSD. Data are presented as  $\pm$ SEM and differences are considered  
187 significant when  $*=p \leq 0.05$ ,  $**=p \leq 0.01$ ,  $***=p \leq 0.001$ , and  $****=p \leq 0.0001$ .

188

## 189 Results

### 190 *Disruption of PaNA does not alter growth dynamics, but promotes pyocyanin production*

191 We initially observed that PAO1 $\Delta$ 2794, a strain with an allelic deletion of PaNA,  
192 exhibits increased pyocyanin production compared to its wildtype counterpart,  
193 PAO1[44]. To determine whether this increased pyocyanin production was due to a  
194 disruption in PaNA, the enzyme which cleaves pseudaminic acid, we repeated the  
195 experiment with a PaNA transposon mutant, PW5679[33, 34]. Compared to its wildtype  
196 counterpart, MPAO1, again the PaNA mutant exhibits increased pyocyanin production  
197 (Figure 1A). As pyocyanin production is one QS readout, this observation suggests that  
198 PaNA and/or pseudaminic acid is important for QS. Both PaNA mutant strains exhibit  
199 altered behavior over the course of growth. That is, they both produce pigmentation,  
200 causing a shift in the yellowish media to a green that deepens over time. The strains  
201 begin producing this visible coloration at approximately six hours of growth. Pyocyanin  
202 was measured in the culture supernatants, as shown in Figure 1A. Both PaNA mutant  
203 strains produce significantly more pyocyanin under batch culture conditions than the  
204 wildtype strains. While the wildtype strains are capable of producing pyocyanin, under  
205 these growth conditions they produce nominal amounts that generally do not cause a  
206 visible color change in the culture media. Because QS is population density dependent,  
207 we next measured bacterial growth (Figure 1B). Figure 1B shows the growth of the  
208 PaNA mutant strains over 12 hours compared with wildtypes PAO1 and MPAO1.

209 Population density was measured as the Optical Density (OD600) over time. The  
210 mutant strains and wildtype strains grow in almost identical patterns indicating that the  
211 loss of PaNA does not affect the bacteria's viability or ability to grow in batch culture.  
212 Fig 1 Disruption of PaNA elicits enhanced pyocyanin production. PaNA mutants  
213 produce more pyocyanin and sooner in the growth curve than wildtype populations.  
214 The represented data are an average of an n=3 where the mutant is compared to its  
215 corresponding wildtype at that timepoint. Significance is indicated when \*p≤0.05,  
216 \*\*p≤0.01, \*\*\*p≤0.001, and \*\*\*\*p≤0.0001. (1A). Wildtype strains and mutant strains  
217 exhibit comparable growth in LB media (n=3) (1B). There was a trend towards  
218 increased Las activity in the PaNA mutants (n=3) (1C), however, there was no  
219 difference from wildtype in swarming behavior (n=3) (1D), indicating that pyocyanin is  
220 the most affected level of QS.

221

### 222 *Disruption of PaNA does not alter LasB production or Swarming Behavior*

223 Pyocyanin production is largely controlled by the PQS branch of QS, however,  
224 the PQS branch itself is regulated by the Las system[9]. We next asked whether the  
225 disruption of PaNA caused increased activity in all levels of QS. Skim-milk clearance  
226 was utilized to assess activation of the Las system as the Las-controlled LasB enzyme  
227 will degrade casein in the milk producing a clear zone around the colony. Nutrient agar  
228 plates containing skim milk were inoculated with the strains and allowed to grow  
229 overnight. After 24 hours of growth, the plates were photographed and ImageJ was  
230 utilized to measure the area of the zone of clearance, the area of the colony, and the  
231 area of the plate. The ratio of the zone of clearance to the colony size normalized by

232 the area of the plate is shown in Figure 1C. While there is no significant difference  
233 between the PaNA mutants and their respective wildtype controls, there is a trend  
234 towards an increase in the area of clearance in the PaNA mutants. This experiment  
235 was controlled using a naturally LasB deficient wildtype strain, Pa103[48].

236 We next interrogated the Rhl branch of QS using swarming motility of the  
237 bacteria as an indicator of rhamnolipid production. *P. aeruginosa* can exhibit swarming  
238 motility on soft agar plates under appropriate conditions. This behavior relies on  
239 multiple factors including functioning flagella, but also the production of rhl-regulated  
240 rhamnolipid. Rhamnolipid acts as a biosurfactant to lower the surface tension of the  
241 agar allowing the bacteria to swarm away from the inoculation site. This experiment  
242 was controlled with a naturally non-flagellated strain, Pa103[49]. No mutant strain  
243 exhibited increased swarming motility compared with its parental wildtype strain.  
244 However, as all the strains, with the exception of Pa103, exhibited swarming, it also  
245 indicates the flagella of the PaNA mutant strains are functional and able to allow this  
246 form of motility (Figure 1D). Taken together, these data indicate that despite nearly  
247 identical growth patterns and population density, disruption of the PaNA gene causes  
248 an anomalous QS phenomenon, namely the over-production of pyocyanin.

249  
250 *Pyocyanin production can be induced in the wildtype strains using conditioned media*

251 We next asked whether this decoupling of pyocyanin production in the mutant  
252 strains from population density was in fact a QS-regulated phenomenon. In order to  
253 address this we conducted an induction experiment based on a central tenant of QS:  
254 the signal should be transferable and the behavior inducible at an earlier timepoint in a

255 wildtype population[50]. Early work in QS showed that the quorum, or the minimal  
256 behavioral unit of bacteria, could be left-shifted using conditioned media which would  
257 contain the signaling molecules necessary to potentiate the behavior[5, 50, 51]. We  
258 grew wildtype PAO1 and MPAO1 in the presence of 10% culture supernatant harvested  
259 from overnight culture of the wildtype strains and the PaNA mutant strains. We then  
260 measured the pyocyanin production of the wildtype strains over 24 hours. Figure 2  
261 shows that the signal is transferable to the wildtype strains and the behavior is inducible  
262 in PAO1 (Figure 2A) and MPAO1 (Figure 2B).

263 Fig 2 Wildtype strains can be induced to produce pyocyanin in conditioned media.  
264 Pyocyanin is produced in the wildtype strains in response to growth in the presence of  
265 10% conditioned media indicating transferability of the QS signaling molecules.  
266 Wildtype strain PAO1 (2A) was grown with 10% cell-free culture supernatant from PAO1  
267 and PAO1 $\Delta$ 2794 (n=3). MPAO1 (2B) was grown in 10% cell-free culture supernatant  
268 from MPAO1 and PW5679 (n=3). The represented data are an average of an n=3  
269 where the mutant is compared to its corresponding wildtype at that timepoint.  
270 Significance is indicated when \*p $\leq$ 0.05, \*\*p $\leq$ 0.01, \*\*\*p $\leq$ 0.001, and \*\*\*\*p $\leq$ 0.0001.

271 Importantly, while the behavior is inducible earlier in wildtype strains grown in  
272 10% supernatant, these cultures also produced pyocyanin at a higher magnitude than  
273 wildtypes grown in naïve media. The wildtype strains in naïve media do not exhibit an  
274 increased production of pyocyanin within the 24 hours assessed. The pyocyanin  
275 production in the wildtypes in naïve LB broth is relatively steady after 9 hours of growth  
276 and is rarely enough to cause a visible shift in the color of the media, while the wildtypes  
277 in media containing 10% culture supernatants produced increased pyocyanin

278 production by 9 or 12 hours that is consistently higher than un-induced wildtypes. This  
279 increase in the pyocyanin production under the induced conditions, along with the  
280 occurrence at an earlier time point, suggests a left-shift in the quorum due to the  
281 artificial abundance of QS signal, indicating that this is a QS controlled phenomenon.

### 282 *Pyocyanin production relies on MvfR*

283 We next asked whether pyocyanin production may be occurring through a  
284 pathway other than the canonical PQS system of QS. To address this question, we  
285 used an available mutant strain PW2812 which carries a disruption in the *MvfR* gene.  
286 As expected, culture supernatant from the PaNA mutants, wildtypes, or PW2812 was  
287 not able to induce pyocyanin production in the *mvfR*-mutant strain (Figure 3A).  
288 However, culture supernatant from PW2812 was able to induce QS in the wildtype  
289 MPAO1 (Figure 3B), indicating that the *las* and *rhl* signals are present in the PW2812  
290 strain. Taken together, we determined pyocyanin production is reliant on functional  
291 *MvfR*. This further supports the indication that the disruption of PaNA impacts the PQS  
292 arm of QS to cause an overproduction of pyocyanin.

293 Fig 3 Pyocyanin production is *MvfR* dependent. Strain PW2812, which harbors a  
294 disrupted *MvfR* gene, was incapable of producing pyocyanin in any conditioned media  
295 (n=3) (3A). However, conditioned media from PW2812 was able to induce QS in the  
296 wildtype MPAO1 (n=3) (3B). The represented data are an average of an n=3 where the  
297 mutant is compared to its corresponding wildtype at that timepoint. Significance is  
298 indicated when \*p≤0.05, \*\*p≤0.01, \*\*\*p≤0.001, and \*\*\*\*p≤0.0001.

299

300



301 *Glycosylation is temporally dynamic and alters during QS*

302 We next asked three questions: 1) Are there differences in protein glycosylation  
303 patterns between the PaNA mutants and wildtype? 2) Do glycosylation patterns change  
304 in the wildtype strains over time? and 3) Do glycosylation patterns in the wildtype  
305 change during QS? In order to address these questions, we conducted lectin blots on  
306 lysate fractions from bacteria grown either in native LB or after induction to quorum  
307 sense. Figure 4 shows the dynamic nature of glycosylation patterns as evidenced by the  
308 binding of fucose-specific lectin from Lotus. This lectin was chosen because there were  
309 indicators that fucose may be a likely sugar to detect. Namely, the *P. aeruginosa* lectin  
310 LecB is specific for fucose and has been shown to associate with the bacterial surface  
311 after it is secreted [52]. Figure 4 shows the patterns of glycosylation change both over  
312 the growth of the bacteria (4A) and in response to the induction of QS to produce  
313 pyocyanin (4B). We highlighted the molecular weight region above 75 kDa due to minor  
314 endogenous biotinylation observed below 75 kDa in a streptavidin-only control blot.  
315 Despite limiting the view of the blots, this area shows that glycosylation is dynamic over  
316 time as well as is altered during QS in the wildtype. Specifically, a doublet develops  
317 around 100 kDa when MPAO1 is induced to QS (Figure 4B). Additionally, this doublet  
318 also appears by 24 hours of growth in the MPAO1 strain grown in naïve LB broth  
319 (Figure 4A). This indicates that glycosylation is a dynamic occurrence in the wildtype  
320 strain and is a responsive feature of the physiology of the bacteria. Additionally, we  
321 asked whether there were inherent differences in the patterns of glycosylation between  
322 the wildtype strains and the strains carrying mutations in PaNA. Using fucose-reactive  
323 Lotus lectin, Figure 4C shows that there are differences in protein glycosylation between

324 wildtype strains and PaNA mutants. The 100 kDa doublet seen in QS-induced MPAO1  
325 is present at 6 hours in both PaNA mutant strains but is absent from both MPAO1 and  
326 PAO1 at 6 hours. Additionally, there is a molecular weight shift in a pair of bands  
327 occurring at approximately 75 kDa, wherein the bands in the wildtype migrate slightly  
328 further down the gel than do the bands in the mutant strains. Taken together these data  
329 show that glycosylation, as represented by fucosylation, is dynamic during the growth of  
330 the bacteria, is altered in the PaNA mutants, and is altered in QS. It will be important to  
331 determine the nature of the glycan and the identity of the proteins involved. However, it  
332 is beyond the scope of this work.

333 Fig 4 Glycosylation of *P. aeruginosa* is dynamic. Figure 4A shows that the lectin-  
334 binding pattern of fucose-specific Lotus lectin is dynamic over growth in wildtype  
335 MPAO1 (n=3). Figure 4B shows that there are differences in the glycosylation pattern of  
336 MPAO1 when it is induced to QS by growth in 10% culture supernatant from PW2812.  
337 PW2812 is included as a control, but also shows differences from wildtype. Namely a  
338 doublet at ~100 kDa does not develop in PW2812, even by 24 hours. The QS-induced  
339 MPAO1 develops a doublet by 9 hours whereas the naïve MPAO1 develops the doublet  
340 by 24 hours (n=3). Interestingly the doublet is present at 6 hours in the PaNA mutants  
341 (Figure 4C). In addition to the doublet, there is a molecular weight shift in a pair of  
342 bands occurring at 75 kDa. The bands in the PaNA mutant are slightly higher in  
343 molecular weight than the bands in the wildtype MPAO1 and PAO1 strains (n=3). Blots  
344 shown are representative of n=3 independent experiments.

345

346 *Disruption of multiple glycosyl-associated enzymes results in increased pyocyanin*  
347 *production*

348 We next asked whether this observed dysregulation of pyocyanin production,  
349 putatively via a dysregulation of the QS arm PQS was limited to disruption of PaNA or  
350 whether it may be extrapolated to a global physiological relevance of glycosylation. We  
351 addressed this question by using an assortment of strains carrying transposon  
352 insertions of glycosyl-associated genes (Table I). Some of these disruptions were made  
353 in glycosyl-hydrolases, and others were made in glycosyl-transferases. Many of these  
354 are classified as “probable” proteins[32-34]. Consistent with the growth of the PaNA  
355 mutants, Figure 5A shows that all the strains grow approximately the same under batch  
356 culture conditions. Figure 5B and 5C show the pyocyanin production relative to  
357 population density of the glycosyl-transferases and glycosyl-hydrolases, respectively. In  
358 nearly all strains, there is an increased production of pyocyanin relative to the parent  
359 strain occurring at approximately 6 hours of growth. The only strain that failed to  
360 achieve significant pyocyanin production was PW3528, which contains a mutation in  
361 PA1391 encoding a probable glycosyl-transferase. This uncharacterized protein is  
362 proposed to be a glycosyl-transferase based on a conserved structural motif, however,  
363 it has had no demonstrated function[32]. While this strain, like many others used in this  
364 work, has an uncharacterized function, it’s lack of pyocyanin production suggesting a  
365 degree of variability in the roles that glycosylation plays in QS, but also importantly  
366 indicates that the phenomenon is not artifact of the mutation strategy. The observation  
367 of increased pyocyanin production in the majority of glycosyl-associated mutants is in  
368 agreement with what we observed in the PaNA-disrupted strains. Likewise, we again

369 assessed Las activation with the skim-milk clearance assay (Figure 5D). Some strains  
370 exhibited increased clearance compared with the wildtype strain, while others did not.  
371 The assessment of rhl activation by use of the swarming assay showed no difference  
372 among any of the strains in the ability to swarm (Figure 5E). This ability to swarm is  
373 indicative of functioning flagella as this experiment was controlled with the Pa103 strain  
374 which does not possess flagella[49]. This is significant in that the flagella is a site  
375 known to be glycosylated in some strains of *P. aeruginosa* which may affect motility[53];  
376 however, the flagella appear to be functional in all of the glycosyl-associated mutant  
377 strains.

378 Fig 5 Enhanced pyocyanin production is a global consequence of disruption of glycosyl-  
379 associated enzymes. All strains grow equally well in LB broth (n=3) (5A). Nearly all  
380 strains carrying a disrupted glycosyl-transferase (5B) or glycosyl-hydrolase (5C)  
381 produced more pyocyanin, sooner than wildtype (n=3). There was a trend towards  
382 increased Las activity (5D), however, there was no difference from wildtype in swarming  
383 behavior (5E), indicating that pyocyanin is the most affected level of QS (n=3). The  
384 represented data are an average of an n=3 where the mutant is compared to its  
385 corresponding wildtype at that timepoint. Significance is indicated when \*p≤0.05,  
386 \*\*p≤0.01, \*\*\*p≤0.001, and \*\*\*\*p≤0.0001.

387 Finally, we assessed whether the signal was transferable from some of these  
388 glycosyl-associated mutant strains to wildtype strains. We included two strains with  
389 disrupted QS-regulator enzymes as a control[33, 34]. Culture supernatants were able  
390 to induce pyocyanin production above the background wildtypes in naïve culture media

391 (Figure 6). Even at 24 hours, the pyocyanin produced by induction was detected at a  
392 higher magnitude than that of the uninduced wildtypes.  
393 Fig 6 Wildtype strains can be induced to produce pyocyanin in conditioned media from  
394 various strains. Pyocyanin is produced in the wildtype strains in response to growth in  
395 the presence of 10% conditioned media indicating transferability of the QS signaling  
396 molecules. We assessed a few glycosyl-associated enzymes and included two strains  
397 containing transposons in QS regulators. Even at 24 hours there remains significantly  
398 increased levels of pyocyanin produced by wildtypes when induced to QS than  
399 produced in naïve media (n=3). The represented data are an average of an n=3 where  
400 the mutant is compared to its corresponding wildtype at that timepoint. Significance is  
401 indicated when \*p≤0.05, \*\*p≤0.01, \*\*\*p≤0.001, and \*\*\*\*p≤0.0001.

402

403

#### 404 Discussion

405 This research began with the observation that a strain of *P. aeruginosa* PAO1  
406 from which the neuraminidase (PaNA) gene had been deleted, PAO1Δ2794, exhibited  
407 an altered phenotype from its parental wildtype. Namely, at equal population density,  
408 the deletion mutant produced visible pigmentation under normal growth conditions while  
409 the wildtype did not. This observation led us down the path of an investigation of the  
410 role of PaNA, its target pseudaminic acid/sialic acid, and overall glycosylation in QS of  
411 *Pseudomonas aeruginosa* PAO1. Growth curves conducted revealed that wildtypes  
412 and mutants grow approximately the same in LB broth at 37°C with shaking. This  
413 indicates that the disruption of PaNA as well as the other mutations explored do not

414 impact the viability of the bacteria. That is, they are apparently equally capable of  
415 utilizing the nutrients available in LB broth to multiply and perform functions of life in a  
416 pure culture. Interestingly, the PaNA mutants along with most other glycosyl-associated  
417 mutants do produce visible pigmentation—typically around six hours of growth. This  
418 hyper-pigmentation is not observed in strains carrying mutations in the QS regulator  
419 genes with the exception of the LasI mutant. It was found also that culture supernatant  
420 from glycosyl-associated mutant strains grown overnight could induce a hyper-  
421 pigmentation in the wildtype strains. This indicates that the signal molecules of the QS  
422 cascade are present in the supernatant and are able to initiate and potentiate the QS  
423 phenotype in the wildtype strains meaning that the signal is transferable. Transferability  
424 of the signal to induce the behavior implicates a QS phenomenon[50]. Notably, we  
425 observed a delay in the production of pyocyanin in the induction experiments. In the  
426 mutant strains grown in LB broth alone, visible pyocyanin is produced by six hours of  
427 growth, however in the induction assays, the earliest production of pyocyanin by  
428 wildtypes is around 9 hours of growth. This could be due to a less robust response of  
429 the wildtypes compared to the mutants. That is there are simply not enough bacteria  
430 making pyocyanin so it does not accumulate in the media as quickly. Alternatively, this  
431 could speak to a difference in the signal generated in the mutants and/or the response  
432 to that signal.

433 One observed phenomenon during the course of this study is that over time the  
434 magnitude of pyocyanin measured in the culture supernatants relative to the population  
435 density diminishes. Possible explanations of this include the complexity of the  
436 regulation of pyocyanin production and/or the natural cycling of pyocyanin. It is possible

437 that at later growth phases the bacteria begin to turn off the production of pyocyanin,  
438 although pyocyanin production is generally associated with stationary growth[54, 55].  
439 Pyocyanin production is largely under the control of the PQS system of QS, which itself  
440 is regulated by the Las system to express MvfR, as well as PqsH which is involved in  
441 the final conversion of the quinolone HHQ to PQS [6, 7]. Both HHQ and PQS are  
442 capable of binding to MvfR and potentiating their production, however, *in vitro*, PQS  
443 appears to bind more robustly [7]. Aside from the QS level regulation resulting in the  
444 production of the pyocyanin precursor PCA from two identical, but not entirely  
445 redundant, phenazine operons that are differentially regulated by HHQ-activated and  
446 PQS-activated MvfR, there are three PCA modifying enzymes that produce pyocyanin.  
447 [56, 57]. These enzymes are also under the complex regulation of a two-component  
448 nutritional regulator CbrA/CbrB [54]. Changes at any point in this pathway could alter the  
449 production of pyocyanin. Another explanation is that the pyocyanin produced is being  
450 reduced to another form not detected at the wavelength measured. Pyocyanin can be  
451 neutralized by two-electron reduction to a colorless product, or by glutathione to a less  
452 potent red-brown pigment[58, 59].

453         The present work shows that disruption of various glycosyl-associated enzymes  
454 leads to an over-production of pyocyanin. This apparent de-coupling of population  
455 density and QS in the PQS branch is a novel finding. Further, glycosylation has not  
456 previously been linked to QS. We conducted lectin blots on lysates of bacterial pellets  
457 that were collected either during the induction experiment using the *mvfR* mutant  
458 PW2812 or independently for the purpose of lectin blotting. Lectin blots with fucose-  
459 specific lectin from Lotus revealed three novel pieces of information. First there was a

460 difference in the protein glycosylation pattern of the PaNA mutants compared to  
461 wildtype. This confirmed preliminary data that initiated this investigation. Secondly, the  
462 glycosylation pattern of the wildtype MPAO1 is dynamic over time and growth. Thirdly,  
463 the induction of MPAO1 to QS by growing the bacteria in the presence of 10% culture  
464 supernatant from PW2812 revealed that there are alterations in the glycosylation  
465 patterns that correspond with a QS phenotype. The induction experiment with PW2812  
466 was used for lectin blotting because PW2812 contains a mutation in a QS regulator, not  
467 a glycosyl-associated enzyme. While we recognize the importance of identifying the  
468 proteins and glycans involved in this pathway, it is beyond the scope of this work.  
469 Overall, the observation of glycosylation changes in the induced wildtype samples  
470 strengthens the argument that wildtype glycosylation is an important determinant of QS.

471 We used a fucose-specific lectin from Lotus due to various indications that at  
472 least some proteins may be fucosylated at the cellular surface. Additionally, *P.*  
473 *aeruginosa* produces a fucose-specific lectin, LecB with has been shown to have  
474 functional roles in biofilm[52]. Fucose is an intriguing sugar that may be a component of  
475 either O-linked or N-linked glycans[60]. Fucosylation has been demonstrated as an  
476 important determinant of the microbiome and colonization of the gut, but this is largely in  
477 relation to fucosylation occurring on gut mucins[61]. However, fucose can be utilized as  
478 a carbon source for metabolism and can affect behavior of bacteria[62]. Our interest,  
479 however, lies in the occurrence of fucose as a structural modification and/or signaling  
480 mechanism. Altering the composition of the glycan may change the conformation of the  
481 glycan and or protein[63]. Post-translational modifications that alter the conformation of  
482 the protein can have profound consequences to signaling cascades. This is well



483 understood for phosphorylation of proteins, however, has not been well explored in  
484 glycobiology of *P. aeruginosa*. We postulate that glycosylation may act as signaling  
485 mechanism that regulates QS.

486 Our knowledge of protein glycosylation in *P. aeruginosa* is limited to a few  
487 characterized proteins and glycans: namely the glycosylation of pili, flagellin, and LecB  
488 lectin[14, 17, 18, 23-28, 53]. One possible target of interest is the outer membrane  
489 porin, OprF. It has been reported to interact with the lectin, LecB, which recognizes  
490 fucose residues[14, 52]. Additionally, OprF has been reported to stimulate QS behavior  
491 in the bacteria in response to activation during infection by host INF $\gamma$ [64]. OprF  
492 provides an interesting juxtaposition of being an outer membrane protein that responds  
493 to the environment, likely glycosylated as evidenced by its interaction with LecB, as well  
494 as a demonstrated role in QS regulation[52, 64-66]. While this work does not address  
495 any specific glycan or protein, it does highlight a physiological phenomenon that is  
496 largely unexplored. As evidenced by this work, this has profound consequences for the  
497 bacteria. Considering the importance of pyocyanin as a virulence factor, understanding  
498 the sequence of events that leads to its over-production is vastly important. Beyond  
499 pyocyanin alone, the novel finding that QS may be dysregulated when glycosylation is  
500 dysregulated has a plethora of opportunities for future studies. Quorum sensing plays  
501 important roles in the bacterial physiology and life cycle and is an important component  
502 of *P. aeruginosa*'s ability to cause infection or establish a mature biofilm[67-75].  
503 Understanding the roles of glycosylation in QS in *P. aeruginosa* may very well open new  
504 avenues of research for developing strategies for combatting infections caused by *P.*

505 *aeruginosa*. This work lays the groundwork for exploring glycosylation as an important  
506 regulatory system which could be a therapeutic target.

507         This work also advances the field of glycobiology in *P. aeruginosa* by presenting  
508 a preliminary exploration of uncharacterized probable glycosyl-associated enzymes. A  
509 few of the strains used carry mutations in enzymes that have been described in various  
510 glycosylation-associated functions such as exopolysaccharide construction[32-34, 44].  
511 However, the majority of the enzymes explored have unknown functions and unknown  
512 substrates: both carbohydrate and platform such as protein or lipid[32-34]. We show,  
513 however, that these enzymes have some physiological significance to the bacteria. We  
514 provide a foundation for further exploration of these enzymes to gain understanding of  
515 how they interact with QS as well as to characterize their function and substrates.  
516 Additionally, this work shows that even the enzymes which have a characterized  
517 function may play multiple roles in the bacteria. For example, strains PW6130 and  
518 PW4801, which have mutations in genes associated with biofilm exopolysaccharide  
519 synthesis, also exhibit an over-production of pyocyanin[32-34]. While we did not explore  
520 the biofilm formation in these strains, it is of note that disruption of PA2794 was  
521 described previously to inhibit the maturation of biofilm by PAO1[44]. It was also  
522 demonstrated that the deletion of PA2794 altered the virulence of the bacteria in a  
523 mouse model of infection[44]. Altered virulence and biofilm formation in these strains  
524 would indicate that these glycosyl-associated enzymes, and therefore glycosylation, is  
525 important for the viability and fitness of the bacteria. This raises the potential of the  
526 pathways and enzymes being therapeutic targets for combatting colonization and  
527 infection by *P. aeruginosa*.

528           Taken together this work has demonstrated that disruption of various enzymes  
529 associated with or predicted to be associated with glycosylation pathways of  
530 *Pseudomonas aeruginosa* leads to an over-production of pyocyanin, suggesting that  
531 proper glycosylation of bacterial proteins is critical for QS regulation. This work  
532 underscores the importance of broadening our understanding of the role of glycosylation  
533 in QS regulation, and we have provided a foundation for a rational exploration of the  
534 field.

#### 535 Acknowledgements

536 We would like to acknowledge Viktoriya Soludushko and Dr. Barnita Haldar for their  
537 advice and technical assistance, Dr. Alice Prince for the generous gift of PAO1 and  
538 PAO1 $\Delta$ 2794 strains, Dr. Jonathan Audia for advice and the gift of Pa103 strain as well  
539 as Drs. Troy Stevens, Diego Alvarez, and Paul Brett for their guidance on this research.

540

541

542

543

544

545

546

547

548

549 References

- 550 1. Breed RS, Murray EGD, Smith NR. *Bergey's Manual of Determinative*  
551 *Bacteriology*. 7th ed. Baltimore: The Williams & Wilkins Company; 1957.
- 552 2. Murray PR, Rosenthal KS, Pfaller MA. *Medical Microbiology*. 5th ed.  
553 Philadelphia, PA: Elsevier Mosby; 2005.
- 554 3. Wagner VE, Bushnell D, Passador L, Brooks AI, Iglewski BH. Microarray analysis  
555 of *Pseudomonas aeruginosa* quorum-sensing regulons: effects of growth phase and  
556 environment. *Journal of Bacteriology*. 2003;185(7):2080-95.
- 557 4. Pearson JP, Passador L, Iglewski BH, Greenberg EP. A second N-  
558 acylhomoserine lactone signal produced by *Pseudomonas aeruginosa*. *Proceedings of*  
559 *the National Academy of Sciences of the United States of America*. 1995;92(5):1490-4.
- 560 5. Winson MK, Camara M, Latifi A, Foglino M, Chhabra SR, Daykin M, et al.  
561 Multiple N-acyl-L-homoserine lactone signal molecules regulate production of virulence  
562 determinants and secondary metabolites in *Pseudomonas aeruginosa*. *Proceedings of*  
563 *the National Academy of Sciences of the United States of America*. 1995;92(20):9427-  
564 31.
- 565 6. Lee J, Zhang L. The hierarchy quorum sensing network in *Pseudomonas*  
566 *aeruginosa*. *Protein & Cell*. 2015;6(1):26-41.
- 567 7. Deziel E, Gopalan S, Tampakaki AP, Lepine F, Padfield KE, Saucier M, et al.  
568 The contribution of MvfR to *Pseudomonas aeruginosa* pathogenesis and quorum  
569 sensing circuitry regulation: multiple quorum sensing-regulated genes are modulated  
570 without affecting lasRI, rhlRI or the production of N-acyl-L-homoserine lactones.  
571 *Molecular Microbiology*. 2005;55(4):998-1014.

- 572 8. Xiao G, Deziel E, He J, Lepine F, Lesic B, Castonguay MH, et al. MvfR, a key  
573 *Pseudomonas aeruginosa* pathogenicity LTTR-class regulatory protein, has dual  
574 ligands. *Molecular Microbiology*. 2006;62(6):1689-99.
- 575 9. Xiao G, He J, Rahme LG. Mutation analysis of the *Pseudomonas aeruginosa*  
576 *mvfR* and *pqsABCDE* gene promoters demonstrates complex quorum-sensing circuitry.  
577 *Microbiology (Reading, England)*. 2006;152(Pt 6):1679-86.
- 578 10. Pessi G, Williams F, Hindle Z, Heurlier K, Holden MT, Camara M, et al. The  
579 global posttranscriptional regulator RsmA modulates production of virulence  
580 determinants and N-acylhomoserine lactones in *Pseudomonas aeruginosa*. *Journal of*  
581 *Bacteriology*. 2001;183(22):6676-83.
- 582 11. Moscoso JA, Mikkelsen H, Heeb S, Williams P, Filloux A. The *Pseudomonas*  
583 *aeruginosa* sensor RetS switches type III and type VI secretion via c-di-GMP signalling.  
584 *Environmental Microbiology*. 2011;13(12):3128-38.
- 585 12. Marden JN, Diaz MR, Walton WG, Gode CJ, Betts L, Urbanowski ML, et al. An  
586 unusual CsrA family member operates in series with RsmA to amplify  
587 posttranscriptional responses in *Pseudomonas aeruginosa*. *Proceedings of the National*  
588 *Academy of Sciences of the United States of America*. 2013;110(37):15055-60.
- 589 13. Kong W, Chen L, Zhao J, Shen T, Surette MG, Shen L, et al. Hybrid sensor  
590 kinase PA1611 in *Pseudomonas aeruginosa* regulates transitions between acute and  
591 chronic infection through direct interaction with RetS. *Molecular Microbiology*.  
592 2013;88(4):784-97.

- 593 14. Bartels KM, Funken H, Knapp A, Brocker M, Bott M, Wilhelm S, et al.  
594 Glycosylation is required for outer membrane localization of the lectin LecB in  
595 *Pseudomonas aeruginosa*. *Journal of Bacteriology*. 2011;193(5):1107-13.
- 596 15. Roth Z, Yehezkel G, Khalaila I. Identification and quantification of protein  
597 glycosylation. *International Journal of Carbohydrate Chemistry*. 2012;2012.
- 598 16. *Essentials of Glycobiology*. nd, Varki A, Cummings RD, Esko JD, Freeze HH,  
599 Stanley P, et al., editors. Cold Spring Harbor (NY): Cold Spring Harbor Laboratory  
600 Press; 2009.
- 601 17. Verma A, Schirm M, Arora SK, Thibault P, Logan SM, Ramphal R. Glycosylation  
602 of b-Type flagellin of *Pseudomonas aeruginosa*: structural and genetic basis. *Journal of*  
603 *Bacteriology*. 2006;188(12):4395-403.
- 604 18. Verma A, Arora SK, Kuravi SK, Ramphal R. Roles of specific amino acids in the  
605 N terminus of *Pseudomonas aeruginosa* flagellin and of flagellin glycosylation in the  
606 innate immune response. *Infection and Immunity*. 2005;73(12):8237-46.
- 607 19. Schirm M, Arora SK, Verma A, Vinogradov E, Thibault P, Ramphal R, et al.  
608 Structural and genetic characterization of glycosylation of type a flagellin in  
609 *Pseudomonas aeruginosa*. *Journal of Bacteriology*. 2004;186(9):2523-31.
- 610 20. Smedley JG, 3rd, Jewell E, Roguskie J, Horzempa J, Syboldt A, Stolz DB, et al.  
611 Influence of pilin glycosylation on *Pseudomonas aeruginosa* 1244 pilus function.  
612 *Infection and Immunity*. 2005;73(12):7922-31.
- 613 21. Qutyan M, Paliotti M, Castric P. PilO of *Pseudomonas aeruginosa* 1244:  
614 subcellular location and domain assignment. *Molecular Microbiology*. 2007;66(6):1444-  
615 58.

- 616 22. Qutyan M, Henkel M, Horzempa J, Quinn M, Castric P. Glycosylation of pilin and  
617 nonpilin protein constructs by *Pseudomonas aeruginosa* 1244. *Journal of Bacteriology*.  
618 2010;192(22):5972-81.
- 619 23. Horzempa J, Dean CR, Goldberg JB, Castric P. *Pseudomonas aeruginosa* 1244  
620 pilin glycosylation: glycan substrate recognition. *Journal of Bacteriology*.  
621 2006;188(12):4244-52.
- 622 24. Horzempa J, Comer JE, Davis SA, Castric P. Glycosylation substrate specificity  
623 of *Pseudomonas aeruginosa* 1244 pilin. *The Journal of Biological Chemistry*.  
624 2006;281(2):1128-36.
- 625 25. DiGiandomenico A, Matewish MJ, Bisailon A, Stehle JR, Lam JS, Castric P.  
626 Glycosylation of *Pseudomonas aeruginosa* 1244 pilin: glycan substrate specificity.  
627 *Molecular Microbiology*. 2002;46(2):519-30.
- 628 26. Comer JE, Marshall MA, Blanch VJ, Deal CD, Castric P. Identification of the  
629 *Pseudomonas aeruginosa* 1244 pilin glycosylation site. *Infection and Immunity*.  
630 2002;70(6):2837-45.
- 631 27. Castric P, Cassels FJ, Carlson RW. Structural characterization of the  
632 *Pseudomonas aeruginosa* 1244 pilin glycan. *The Journal of Biological Chemistry*.  
633 2001;276(28):26479-85.
- 634 28. Castric P. pilO, a gene required for glycosylation of *Pseudomonas aeruginosa*  
635 1244 pilin. *Microbiology (Reading, England)*. 1995;141 ( Pt 5):1247-54.
- 636 29. Hug I, Feldman MF. Analogies and homologies in lipopolysaccharide and  
637 glycoprotein biosynthesis in bacteria. *Glycobiology*. 2011;21(2):138-51.

- 638 30. Wang S, Hao Y, Lam JS, Vlahakis JZ, Szarek WA, Vinnikova A, et al.  
639 Biosynthesis of the common polysaccharide antigen of *Pseudomonas aeruginosa*  
640 PAO1: characterization and role of GDP-D-Rhamnose:GlcNAc/GalNAc-Diphosphate-  
641 Lipid alpha1,3-D-Rhamnosyltransferase WbpZ. *Journal of Bacteriology*.  
642 2015;197(12):2012-9.
- 643 31. Kocincova D, Lam JS. A deletion in the wapB promoter in many serotypes of  
644 *Pseudomonas aeruginosa* accounts for the lack of a terminal glucose residue in the  
645 core oligosaccharide and resistance to killing by R3-pyocin. *Molecular Microbiology*.  
646 2013;89(3):464-78.
- 647 32. Winsor G, Griffiths E, Lo R, Dhillon B, Shay J, Brinkman F. Enhanced  
648 annotations and features for comparing thousands of *Pseudomonas* genomes in the  
649 *Pseudomonas* genome database.: *Nucleic Acids Res.* (2016); 2016 [Available from:  
650 <http://pseudomonas.com/>.
- 651 33. Held K, Ramage E, Jacobs M, Gallagher L, Manoil C. Sequence-verified two-  
652 allele transposon mutant library for *Pseudomonas aeruginosa* PAO1. *Journal of*  
653 *Bacteriology*. 2012;194(23):6387-9.
- 654 34. Jacobs MA, Alwood A, Thaipisuttikul I, Spencer D, Haugen E, Ernst S, et al.  
655 Comprehensive transposon mutant library of *Pseudomonas aeruginosa*. *Proceedings of*  
656 *the National Academy of Sciences of the United States of America*.  
657 2003;100(24):14339-44.
- 658 35. Angata T, Varki A. Chemical diversity in the sialic acids and related alpha-keto  
659 acids: an evolutionary perspective. *Chemical Reviews*. 2002;102(2):439-69.



- 660 36. Cioffi DL, Pandey S, Alvarez DF, Cioffi EA. Terminal sialic acids are an important  
661 determinant of pulmonary endothelial barrier integrity. *American Journal of Physiology*  
662 *Lung Cellular and Molecular Physiology*. 2012;302(10):L1067-77.
- 663 37. Salah Ud-Din AIM, Roujeinikova A. Flagellin glycosylation with pseudaminic acid  
664 in *Campylobacter* and *Helicobacter*: prospects for development of novel therapeutics.  
665 *Cellular and Molecular Life Sciences : CMLS*. 2018;75(7):1163-1178.
- 666 38. Bloch S, Zwicker S, Bostanci N, Sjoling A, Bostrom EA, Belibasakis GN, et al.  
667 Immune response profiling of primary monocytes and oral keratinocytes to different  
668 *Tannerella forsythia* strains and their cell surface mutants. *Molecular Oral Microbiology*.  
669 2018;33(2):155-167.
- 670 39. Delvaux NA, Thoden JB, Holden HM. Molecular architectures of Pen and Pal:  
671 key enzymes required for CMP-pseudaminic acid biosynthesis in *Bacillus thuringiensis*.  
672 *Protein Science*. 2018;27(3):738-49.
- 673 40. Friedrich V, Janesch B, Windwarder M, Maresch D, Braun ML, Megson ZA, et al.  
674 *Tannerella forsythia* strains display different cell-surface nonulosonic acids: biosynthetic  
675 pathway characterization and first insight into biological implications. *Glycobiology*.  
676 2017;27(4):342-57.
- 677 41. Tomek MB, Janesch B, Maresch D, Windwarder M, Altmann F, Messner P, et al.  
678 A pseudaminic acid or a legionaminic acid derivative transferase is strain-specifically  
679 implicated in the general protein O-glycosylation system of the periodontal pathogen  
680 *Tannerella forsythia*. *Glycobiology*. 2017;27(6):555-67.
- 681 42. Wahid SUH. Structural and functional characterization of the *Helicobacter pylori*  
682 cytidine 5'-monophosphate-pseudaminic acid synthase PseF: molecular insight into

- 683 substrate recognition and catalysis mechanism. *Advances and Applications in*  
684 *Bioinformatics and Chemistry* : AABC. 2017;10:79-88.
- 685 43. Knirel YA, Kocharova NA, Shashkov AS, Dmitriev BA, Kochetkov NK,  
686 Stanislavsky ES, et al. Somatic antigens of *Pseudomonas aeruginosa*. The structure of  
687 O-specific polysaccharide chains of the lipopolysaccharides from *P. aeruginosa* O5  
688 (Lanyi) and immunotype 6 (Fisher). *European Journal of Biochemistry*.  
689 1987;163(3):639-52.
- 690 44. Soong G, Muir A, Gomez MI, Waks J, Reddy B, Planet P, et al. Bacterial  
691 neuraminidase facilitates mucosal infection by participating in biofilm production. *The*  
692 *Journal of Clinical Investigation*. 2006;116(8):2297-305.
- 693 45. Leprat R, Michel-Briand Y. Extracellular neuraminidase production by a strain of  
694 *Pseudomonas aeruginosa* isolated from cystic fibrosis. *Annales de Microbiologie*.  
695 1980;131b(3):209-22.
- 696 46. Xu G, Ryan C, Kiefel MJ, Wilson JC, Taylor GL. Structural studies on the  
697 *Pseudomonas aeruginosa* sialidase-like enzyme PA2794 suggest substrate and  
698 mechanistic variations. *Journal of Molecular Biology*. 2009;386(3):828-40.
- 699 47. Kelley SG, Post FJ. *Microbiology Techniques*. Belmont, CA: Star Publishing  
700 Company; 1991.
- 701 48. Gambello MJ, Iglewski BH. Cloning and characterization of the *Pseudomonas*  
702 *aeruginosa* *lasR* gene, a transcriptional activator of elastase expression. *Journal of*  
703 *Bacteriology*. 1991;173(9):3000-9.
- 704 49. Montie TC, Craven RC, Holder IA. Flagellar preparations from *Pseudomonas*  
705 *aeruginosa*: isolation and characterization. *Infection and Immunity*. 1982;35(1):281-8.

- 706 50. Fuqua WC, Winans SC, Greenberg EP. Quorum sensing in bacteria: the LuxR-  
707 LuxI family of cell density-responsive transcriptional regulators. *Journal of Bacteriology*.  
708 1994;176(2):269-75.
- 709 51. Gray KM, Passador L, Iglewski BH, Greenberg EP. Interchangeability and  
710 specificity of components from the quorum-sensing regulatory systems of *Vibrio fischeri*  
711 and *Pseudomonas aeruginosa*. *Journal of Bacteriology*. 1994;176(10):3076-80.
- 712 52. Funken H, Bartels KM, Wilhelm S, Brocker M, Bott M, Bains M, et al. Specific  
713 association of lectin LecB with the surface of *Pseudomonas aeruginosa*: role of outer  
714 membrane protein OprF. *PloS one*. 2012;7(10):e46857.
- 715 53. Arora SK, Neely AN, Blair B, Lory S, Ramphal R. Role of motility and flagellin  
716 glycosylation in the pathogenesis of *Pseudomonas aeruginosa* burn wound infections.  
717 *Infection and Immunity*. 2005;73(7):4395-8.
- 718 54. Huang J, Sonnleitner E, Ren B, Xu Y, Haas D. Catabolite repression control of  
719 pyocyanin biosynthesis at an intersection of primary and secondary metabolism in  
720 *Pseudomonas aeruginosa*. *Applied and Environmental Microbiology*. 2012;78(14):5016-  
721 20.
- 722 55. Mavrodi DV, Bonsall RF, Delaney SM, Soule MJ, Phillips G, Thomashow LS.  
723 Functional analysis of genes for biosynthesis of pyocyanin and phenazine-1-  
724 carboxamide from *Pseudomonas aeruginosa* PAO1. *Journal of Bacteriology*.  
725 2001;183(21):6454-65.
- 726 56. Recinos DA, Sekedat MD, Hernandez A, Cohen TS, Sakhtah H, Prince AS, et al.  
727 Redundant phenazine operons in *Pseudomonas aeruginosa* exhibit environment-

- 728 dependent expression and differential roles in pathogenicity. Proceedings of the  
729 National Academy of Sciences of the United States of America. 2012;109(47):19420-5.
- 730 57. Lundgren BR, Thornton W, Dornan MH, Villegas-Penaranda LR, Boddy CN,  
731 Nomura CT. Gene PA2449 is essential for glycine metabolism and pyocyanin  
732 biosynthesis in *Pseudomonas aeruginosa* PAO1. *Journal of Bacteriology*.  
733 2013;195(9):2087-100.
- 734 58. Cheluvappa R, Shimmon R, Dawson M, Hilmer SN, Le Couteur DG. Reactions of  
735 *Pseudomonas aeruginosa* pyocyanin with reduced glutathione. *Acta Biochimica*  
736 *Polonica*. 2008;55(3):571-80.
- 737 59. Muller M. Glutathione modulates the toxicity of, but is not a biologically relevant  
738 reductant for, the *Pseudomonas aeruginosa* redox toxin pyocyanin. *Free Radical*  
739 *Biology & Medicine*. 2011;50(8):971-7.
- 740 60. Ma B, Simala-Grant JL, Taylor DE. Fucosylation in prokaryotes and eukaryotes.  
741 *Glycobiology*. 2006;16(12):158r-84r.
- 742 61. Pickard JM, Chervonsky AV. Intestinal fucose as a mediator of host-microbe  
743 symbiosis. *Journal of Immunology*. 2015;194(12):5588-93.
- 744 62. Dwivedi R, Nothhaft H, Garber J, Xin Kin L, Stahl M, Flint A, et al. L-fucose  
745 influences chemotaxis and biofilm formation in *Campylobacter jejuni*. *Molecular*  
746 *Microbiology*. 2016;101(4):575-89.
- 747 63. Cote JP, Charbonneau ME, Mourez M. Glycosylation of the *Escherichia coli* TibA  
748 self-associating autotransporter influences the conformation and the functionality of the  
749 protein. *PloS one*. 2013;8(11):e80739.

- 750 64. Wagner VE, Frelinger JG, Barth RK, Iglewski BH. Quorum sensing: dynamic  
751 response of *Pseudomonas aeruginosa* to external signals. *Trends in Microbiology*.  
752 2006;14(2):55-8.
- 753 65. Wu L, Estrada O, Zaborina O, Bains M, Shen L, Kohler JE, et al. Recognition of  
754 host immune activation by *Pseudomonas aeruginosa*. *Science*. 2005;309(5735):774-7.
- 755 66. Bouffartigues E, Gicquel G, Bazire A, Fito-Boncompte L, Taupin L, Maillot O, et  
756 al. The major outer membrane protein OprF is required for rhamnolipid production in  
757 *Pseudomonas aeruginosa*. *Journal of Bacteriology & Parasitology*. 2011.
- 758 67. de Kievit TR. Quorum sensing in *Pseudomonas aeruginosa* biofilms.  
759 *Environmental Microbiology*. 2009;11(2):279-88.
- 760 68. Yang L, Nilsson M, Gjermansen M, Givskov M, Tolker-Nielsen T. Pyoverdine and  
761 PQS mediated subpopulation interactions involved in *Pseudomonas aeruginosa* biofilm  
762 formation. *Molecular Microbiology*. 2009;74(6):1380-92.
- 763 69. O'Loughlin CT, Miller LC, Siryaporn A, Drescher K, Semmelhack MF, Bassler BL.  
764 A quorum-sensing inhibitor blocks *Pseudomonas aeruginosa* virulence and biofilm  
765 formation. *Proceedings of the National Academy of Sciences of the United States of*  
766 *America*. 2013;110(44):17981-6.
- 767 70. Guo Q, Kong W, Jin S, Chen L, Xu Y, Duan K. PqsR-dependent and PqsR-  
768 independent regulation of motility and biofilm formation by PQS in *Pseudomonas*  
769 *aeruginosa* PAO1. *Journal of Basic Microbiology*. 2014;54(7):633-43.
- 770 71. Das T, Sehar S, Manefield M. The roles of extracellular DNA in the structural  
771 integrity of extracellular polymeric substance and bacterial biofilm development.  
772 *Environmental Microbiology Reports*. 2013;5(6):778-86.

- 773 72. Das T, Manefield M. Pyocyanin promotes extracellular DNA release in  
774 *Pseudomonas aeruginosa*. PloS one. 2012;7(10):e46718.
- 775 73. Das T, Kutty SK, Tavallaie R, Ibugo AI, Panchompoo J, Sehar S, et al.  
776 Phenazine virulence factor binding to extracellular DNA is important for *Pseudomonas*  
777 *aeruginosa* biofilm formation. Scientific Reports. 2015;5:8398.
- 778 74. Das T, Kutty SK, Kumar N, Manefield M. Pyocyanin facilitates extracellular DNA  
779 binding to *Pseudomonas aeruginosa* influencing cell surface properties and  
780 aggregation. PloS one. 2013;8(3):e58299.
- 781 75. Das T, Ibugo AI, Klare W, Manefield M. Role of pyocyanin and extracellular DNA  
782 in facilitating *Pseudomonas aeruginosa* biofilm formation. Microbial Biofilms. 2016 2016-  
783 07-13.
- 784

**A**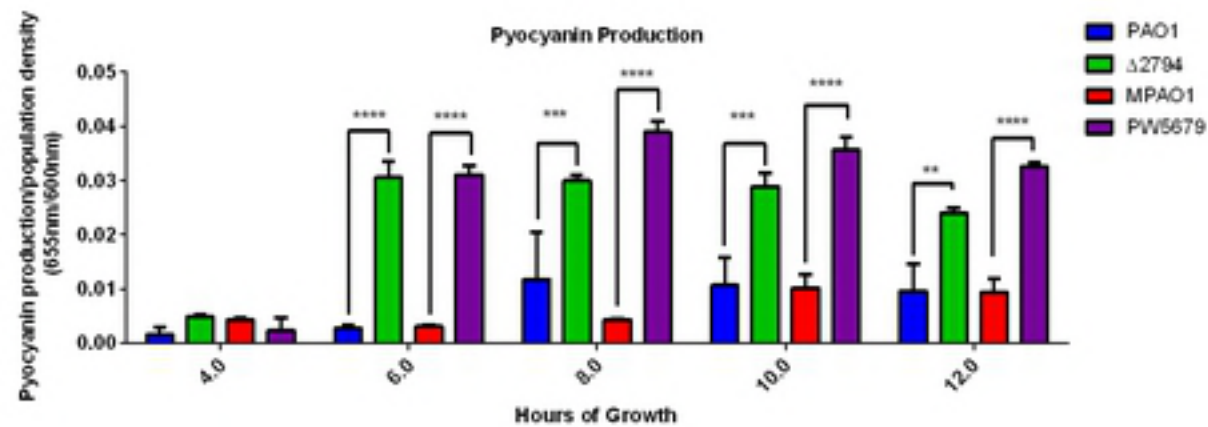**B**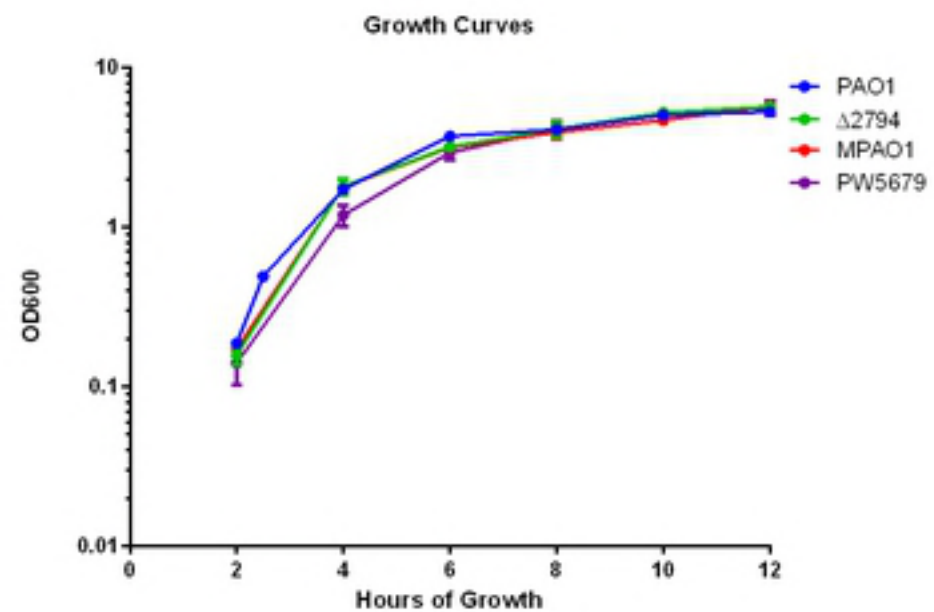**C**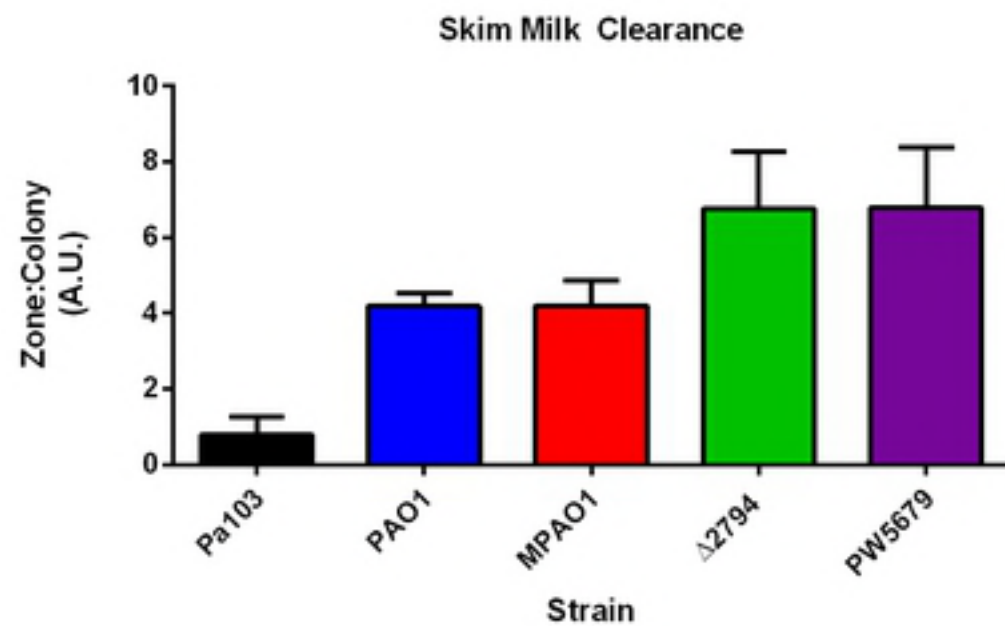**D**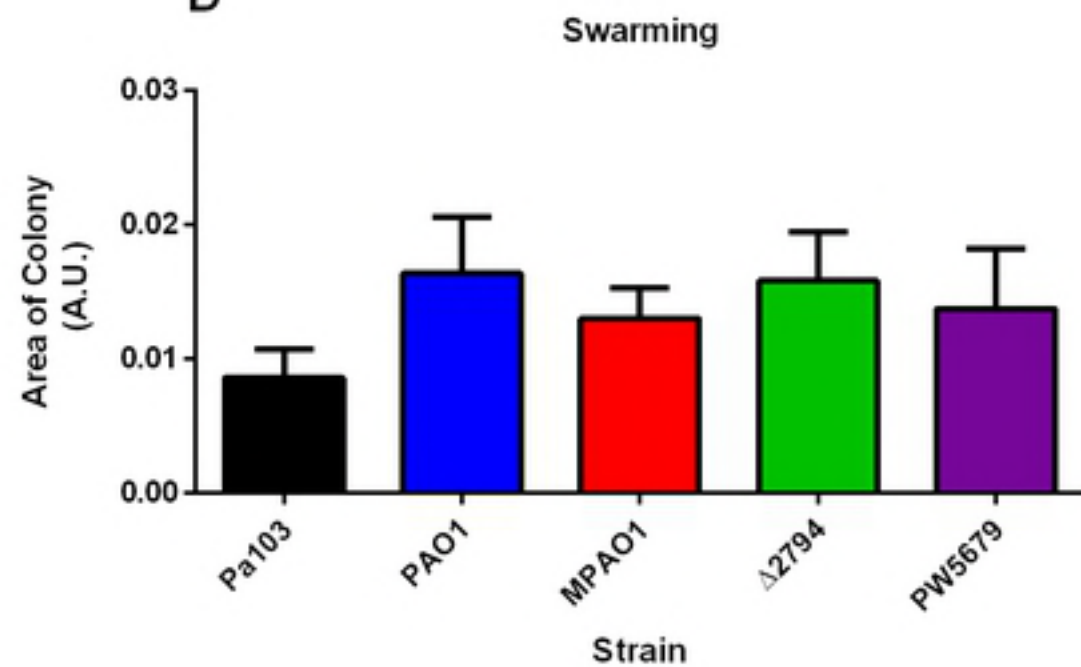

**A**

bioRxiv preprint doi: <https://doi.org/10.1101/319418>; this version posted May 10, 2018. The copyright holder for this preprint (which was not certified by peer review) is the author/funder, who has granted bioRxiv a license to display the preprint in perpetuity. It is made available under aCC-BY 4.0 International license.

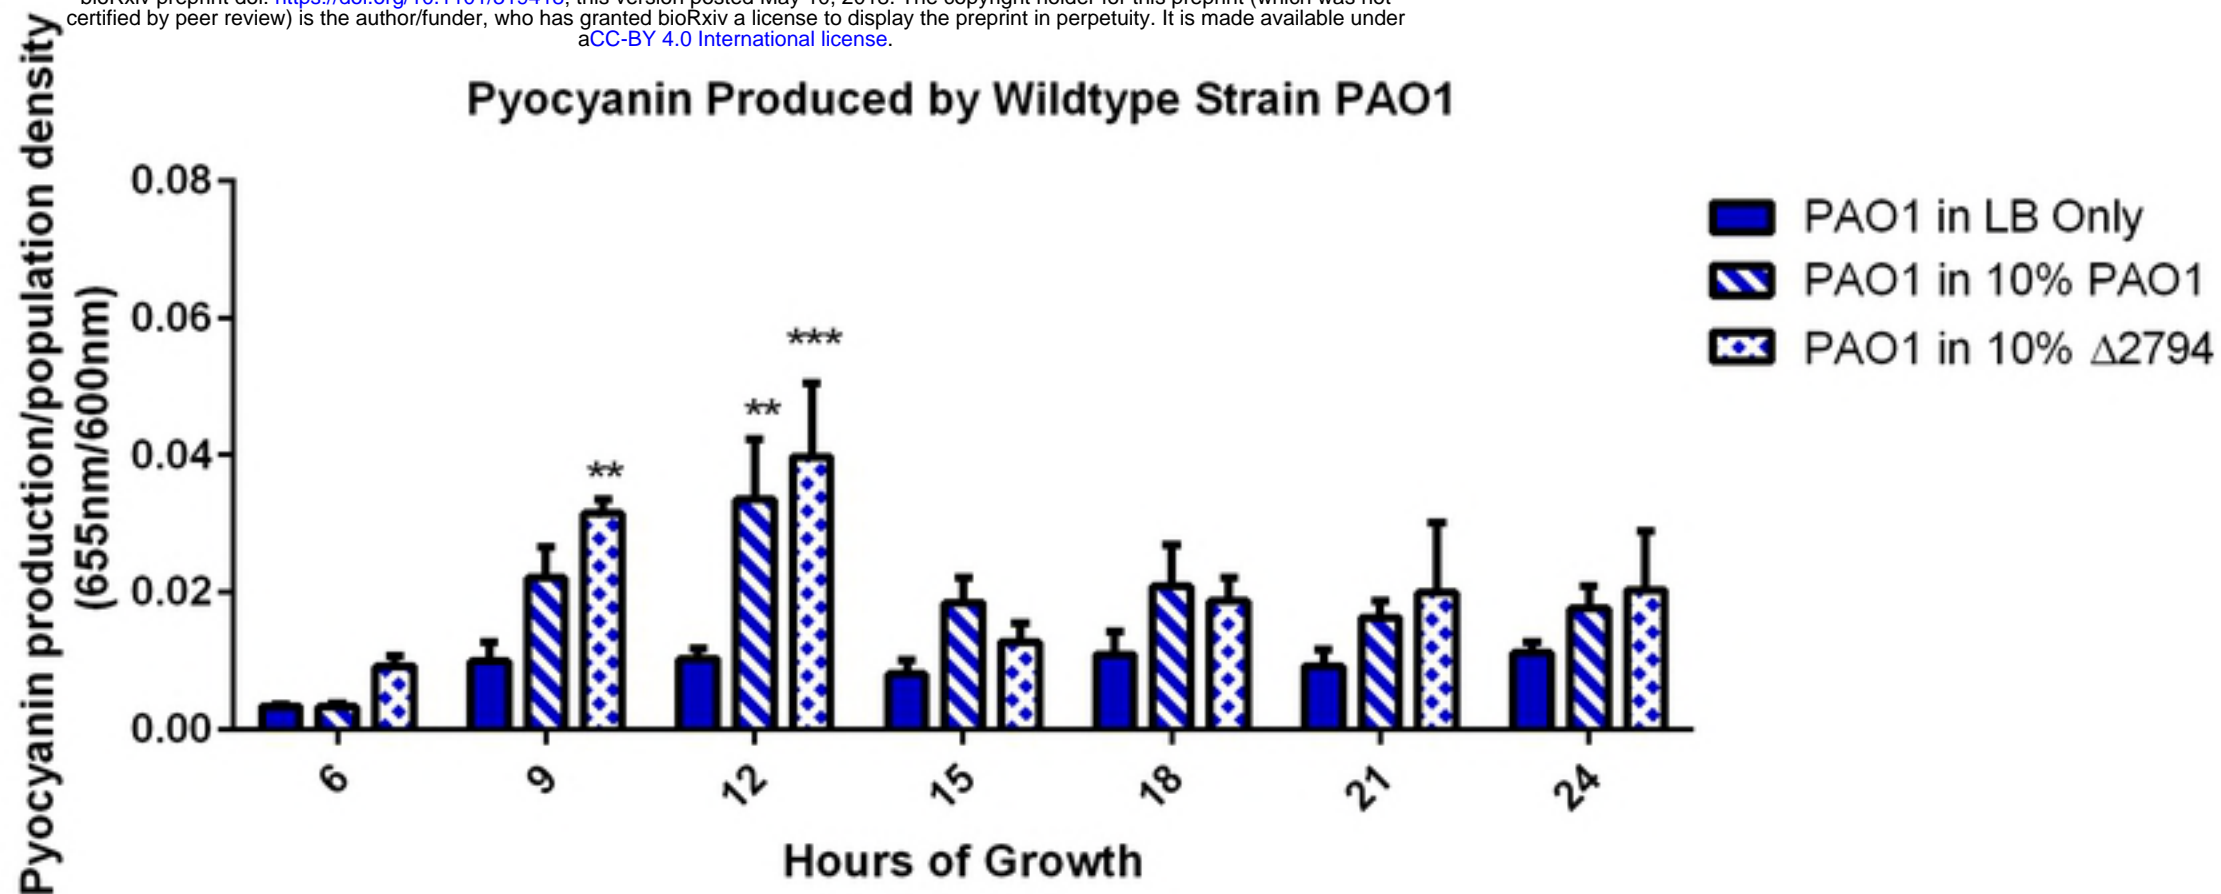**B**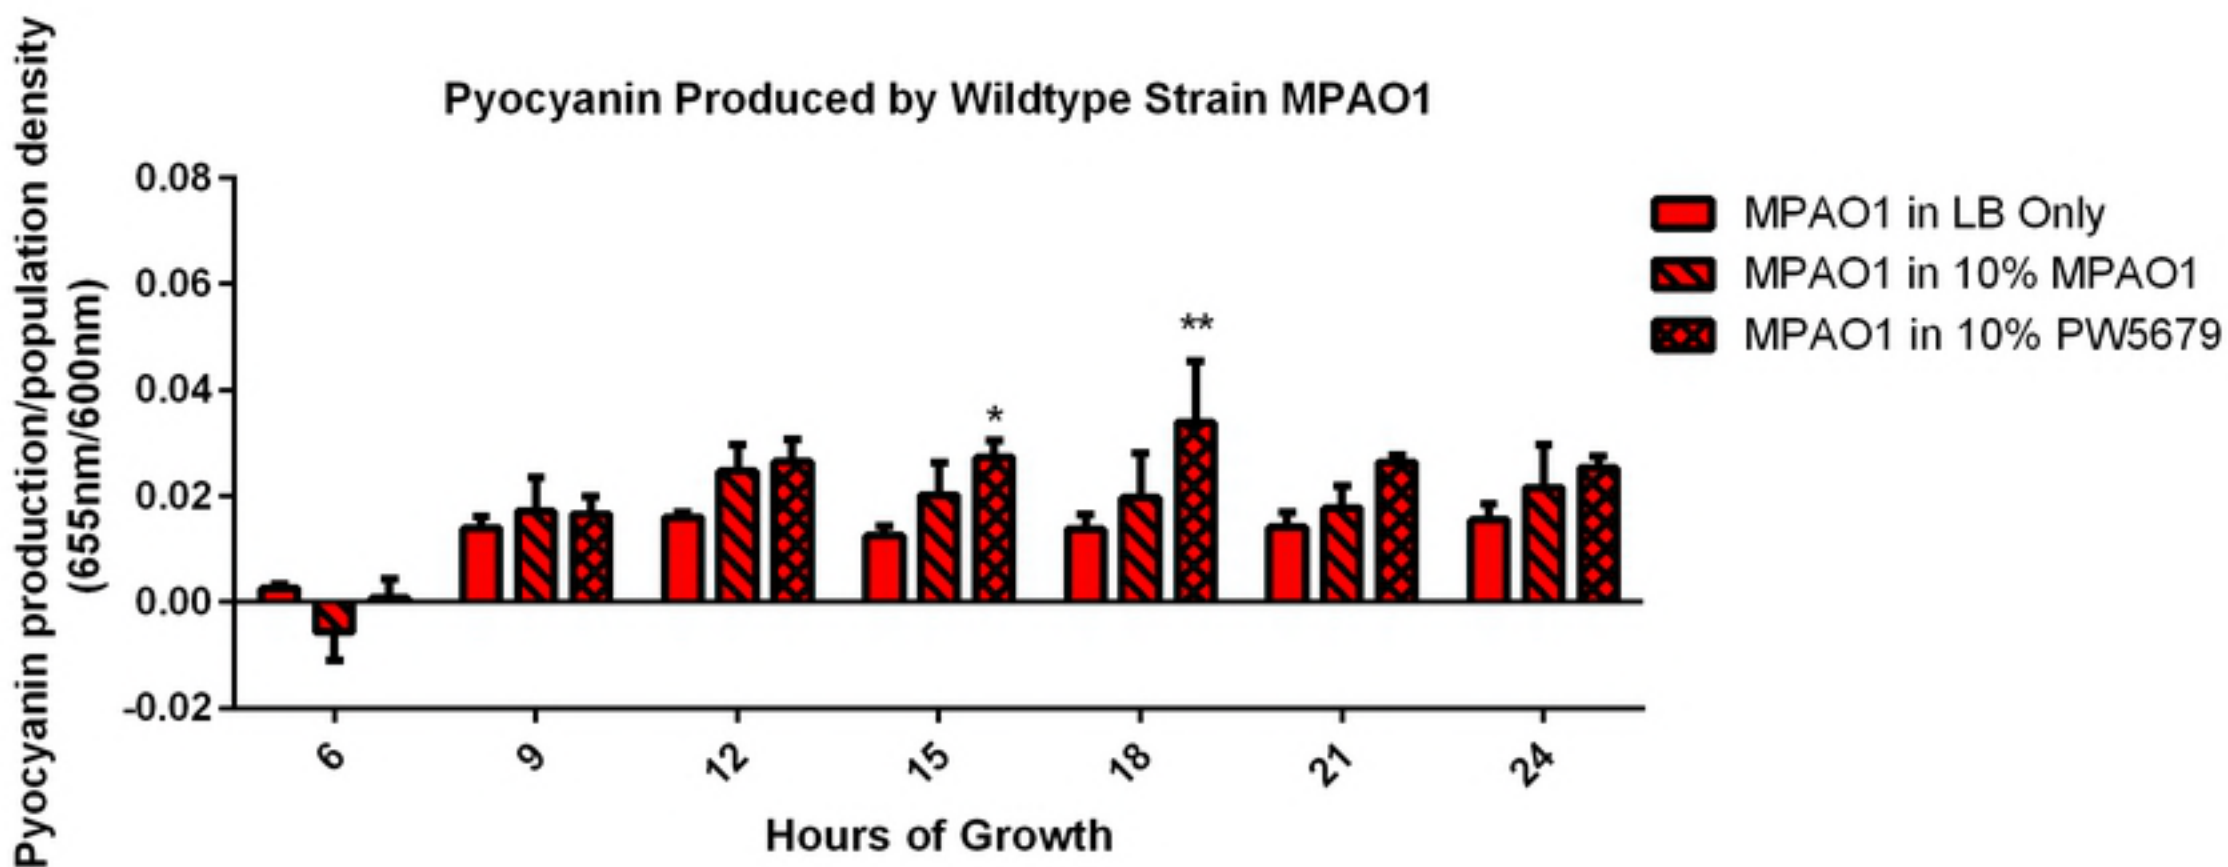



**A**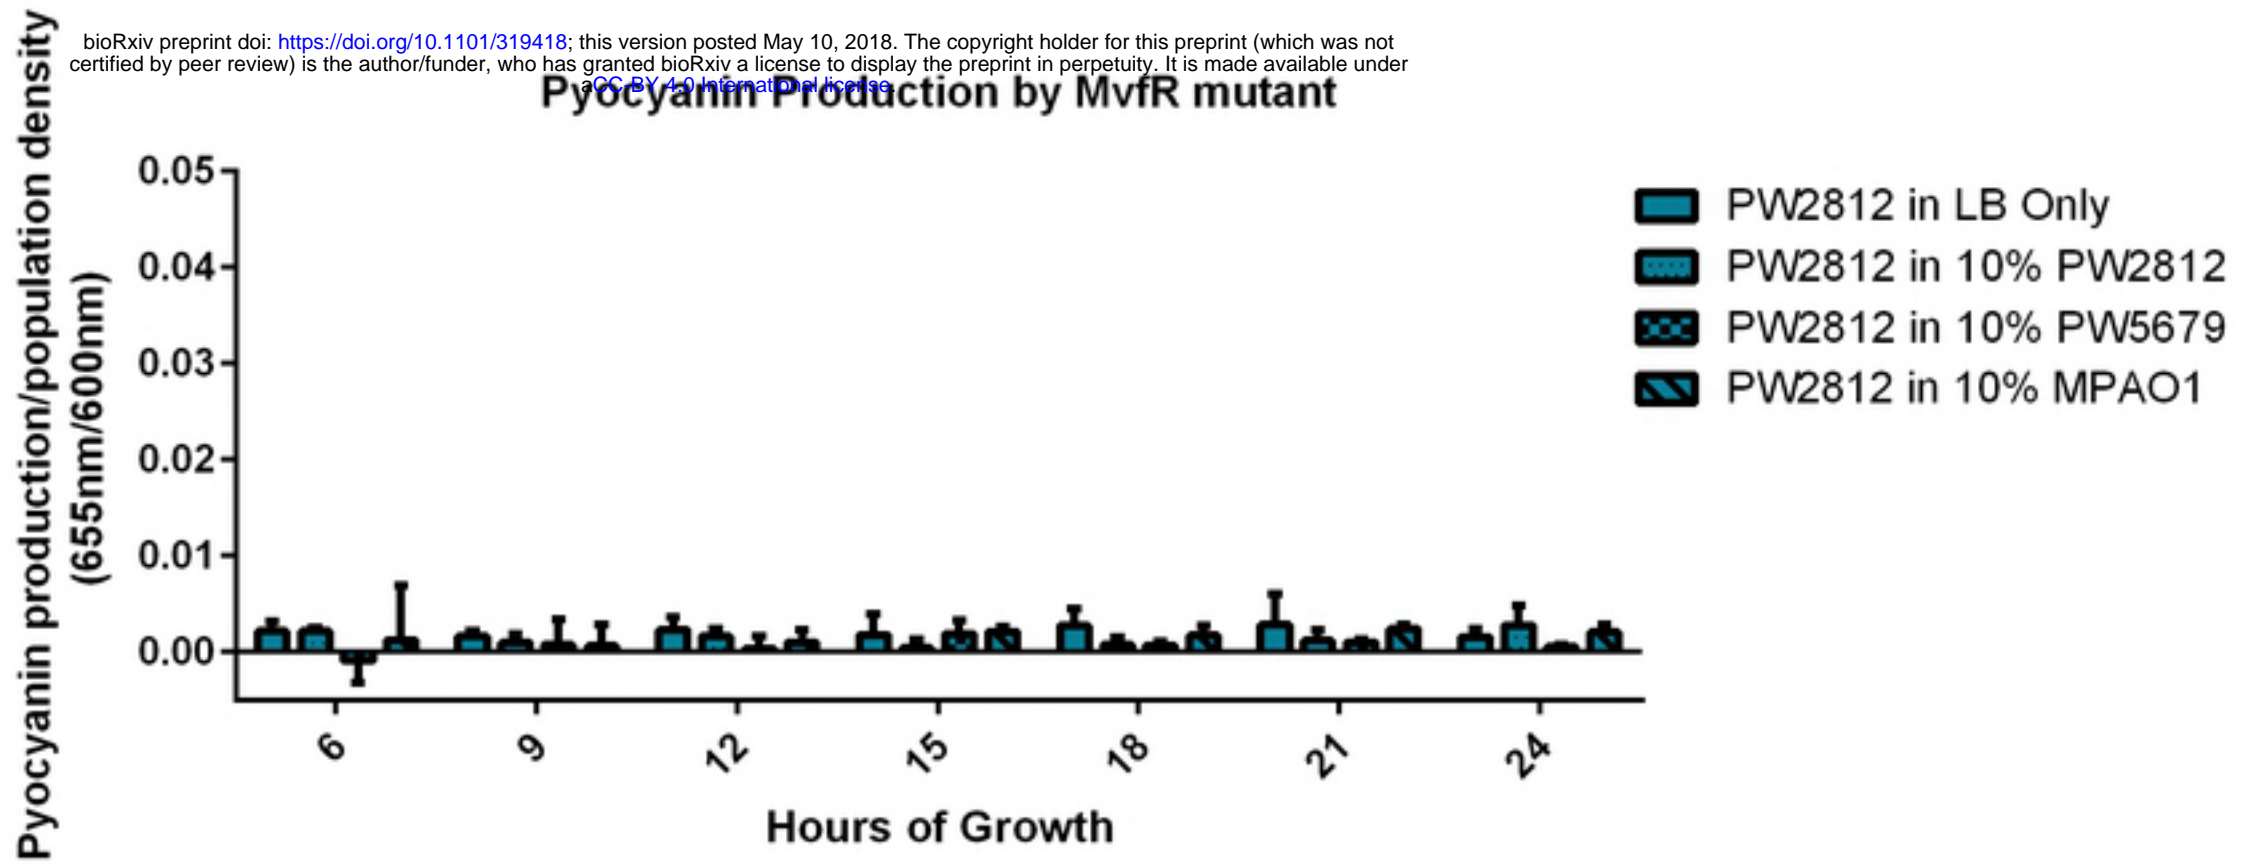**B**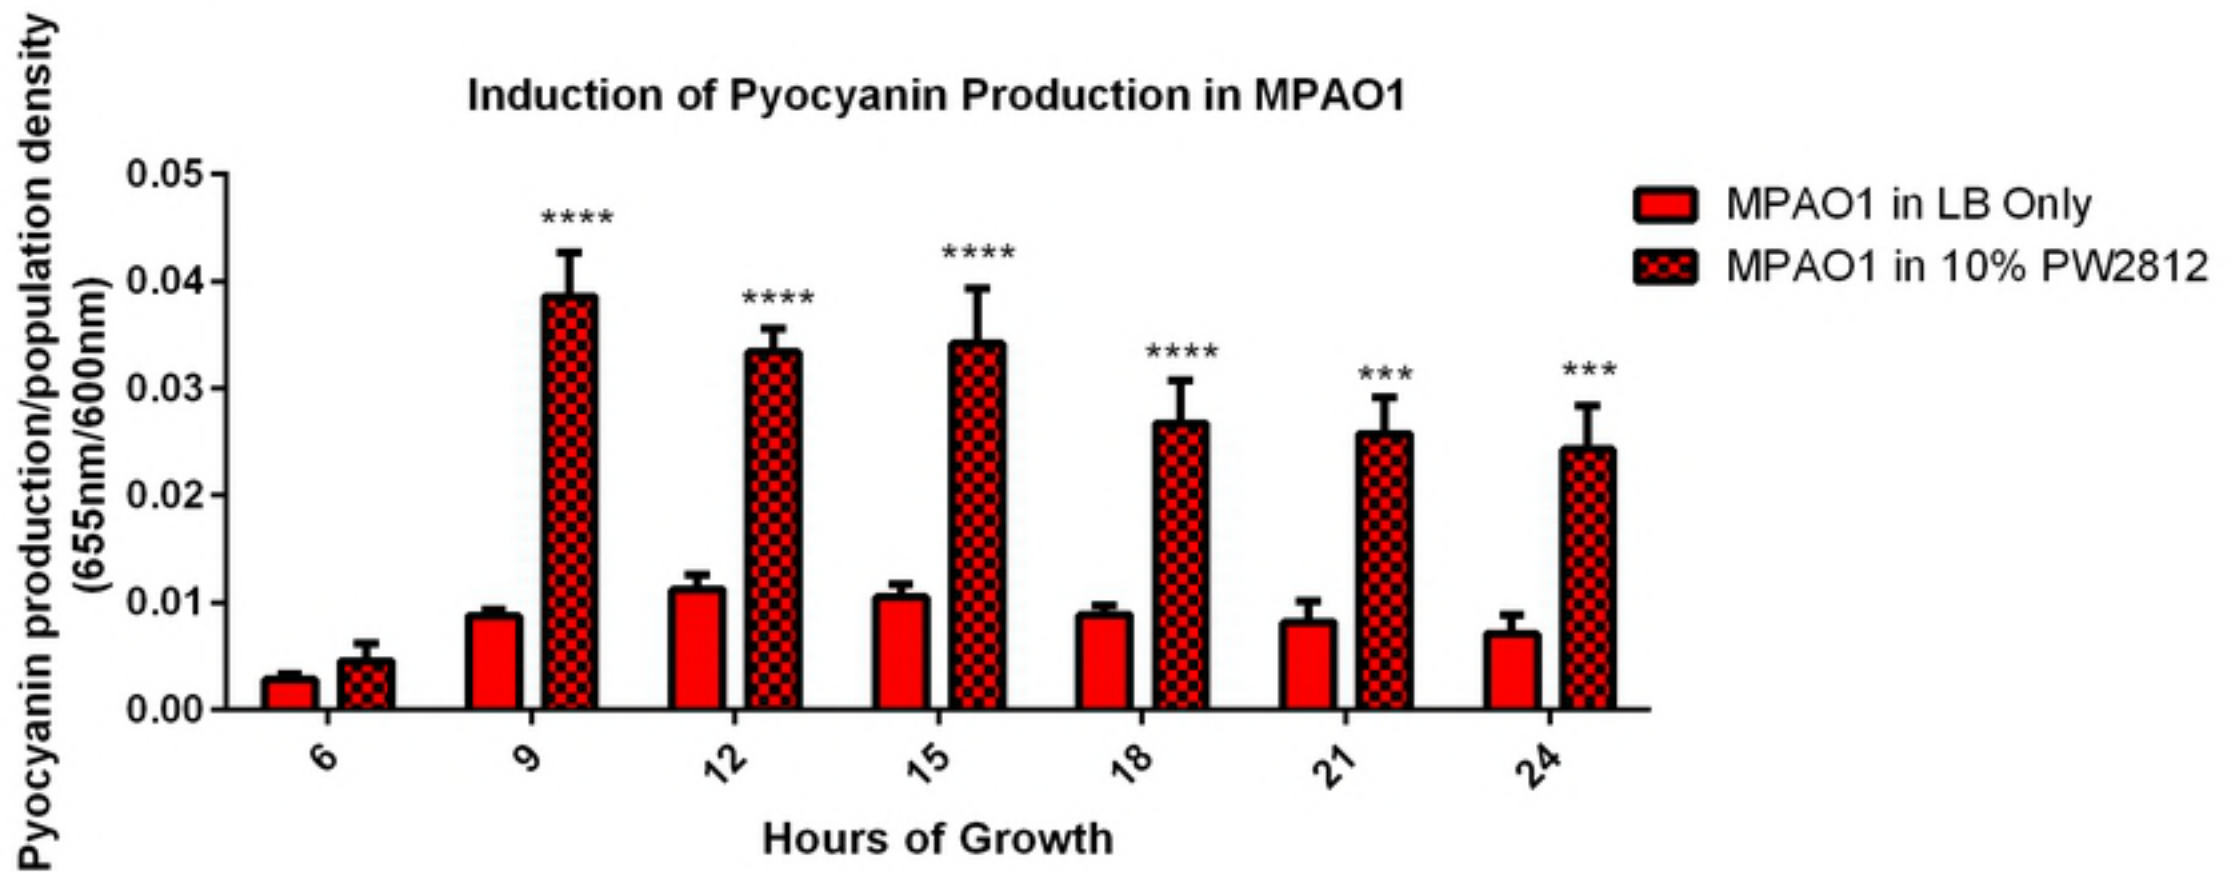

A

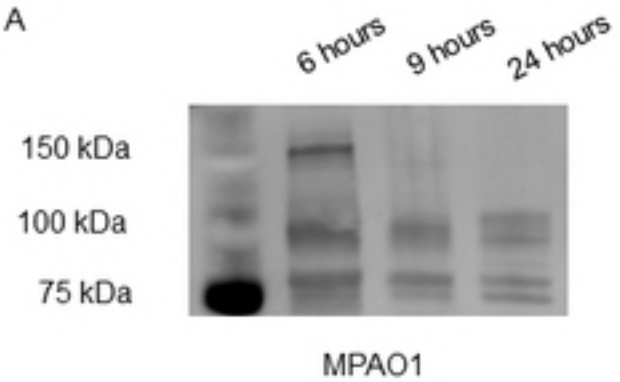

B

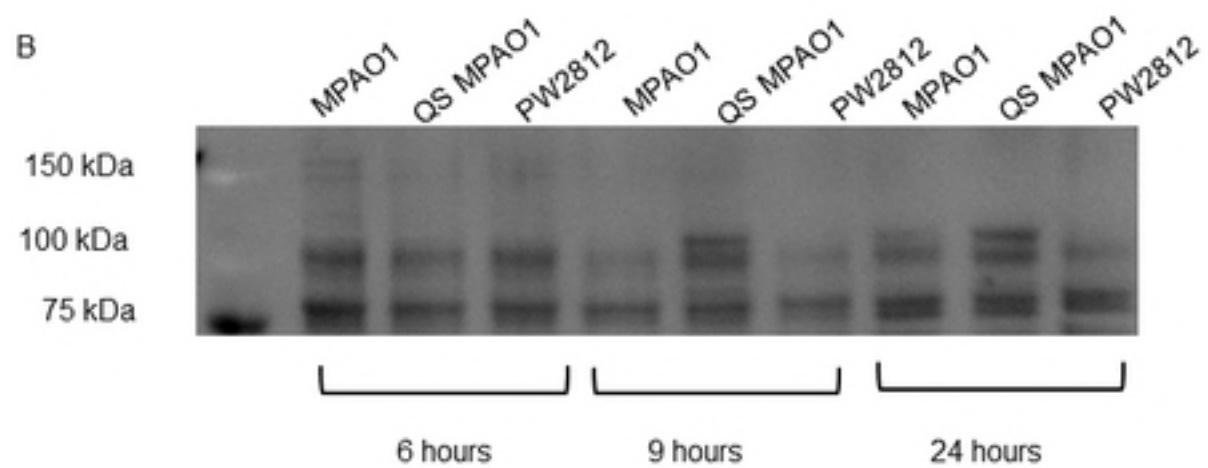

C

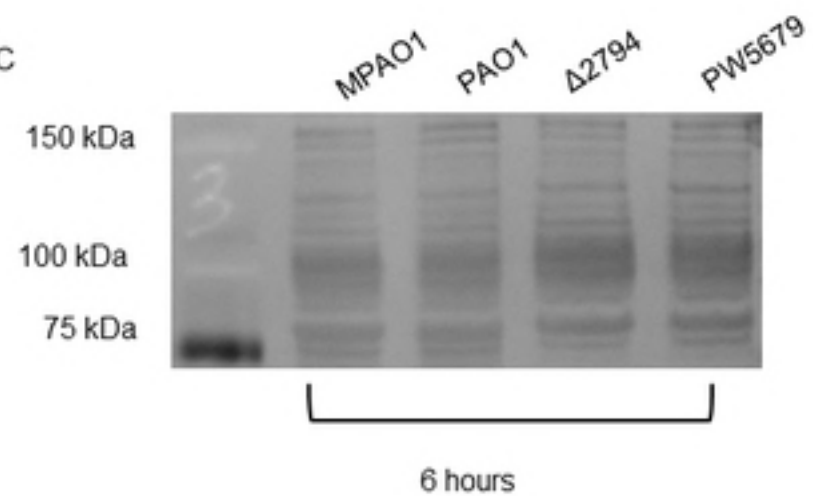

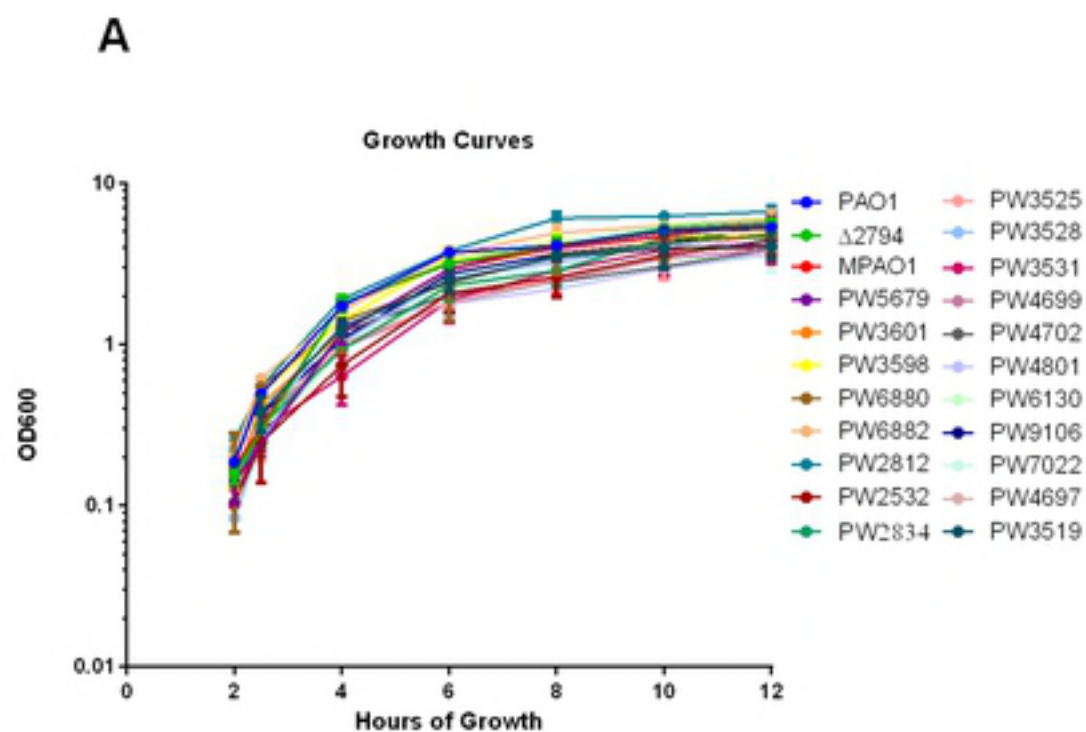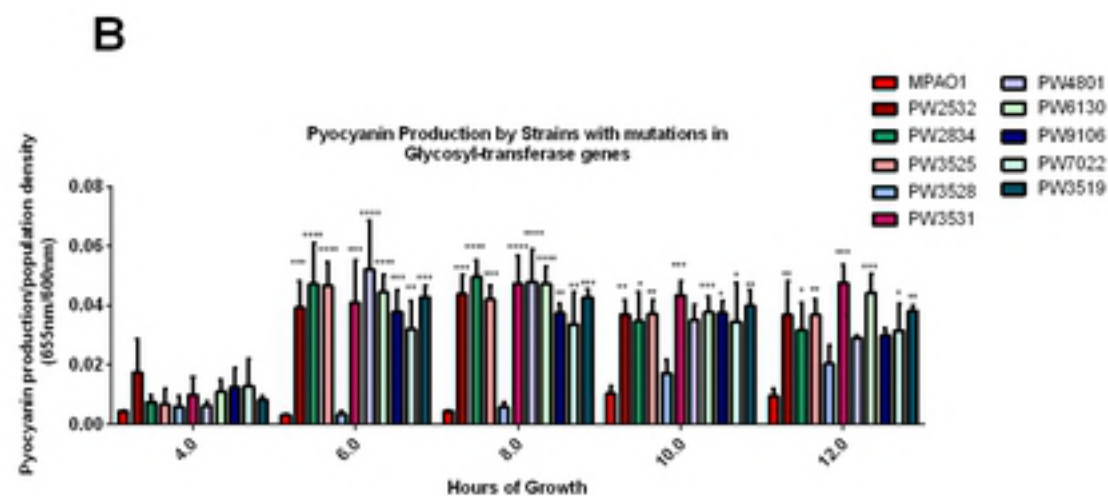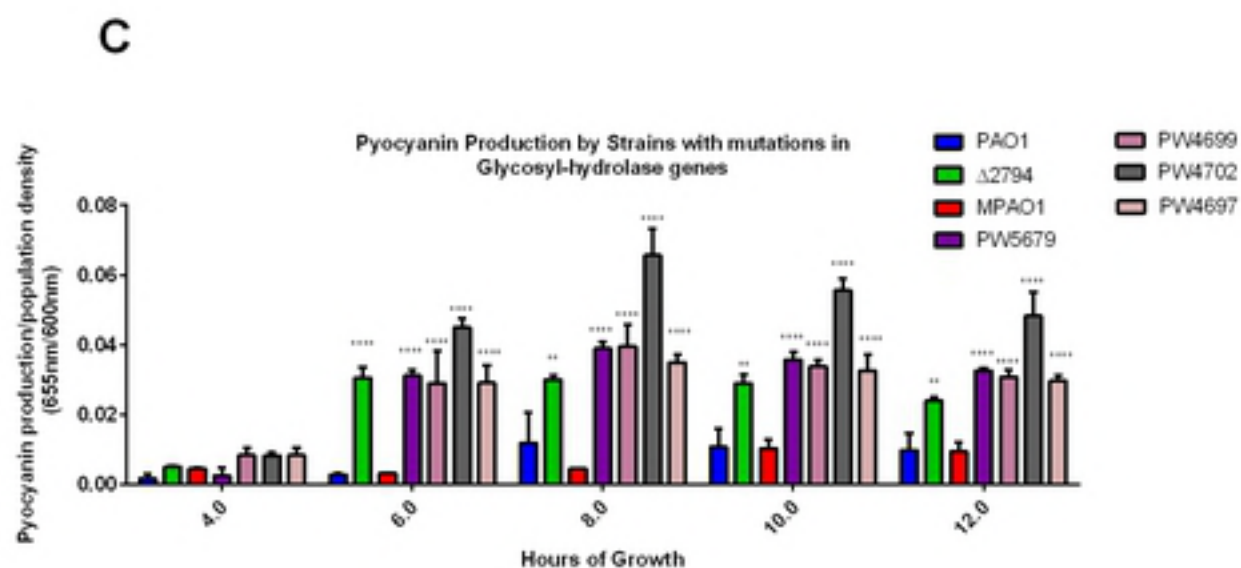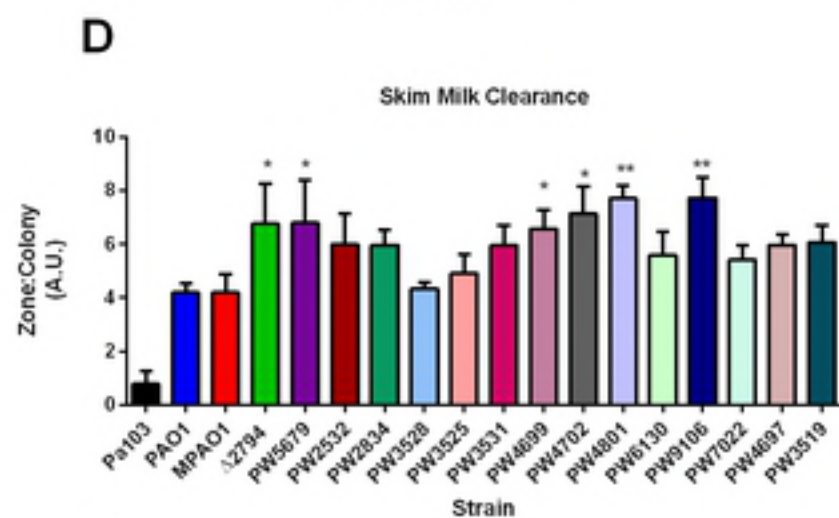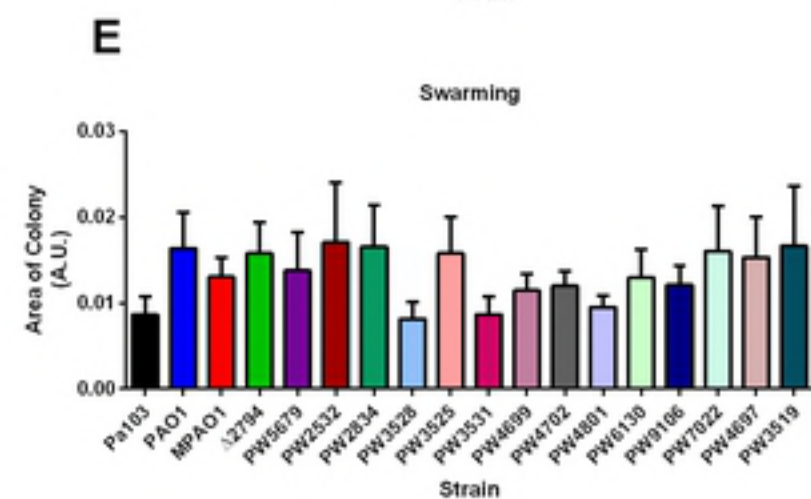

### Pyocyanin Production of Wildtypes in 10% Culture Supernatants

Pyocyanin production/population density  
(655nm/600nm)

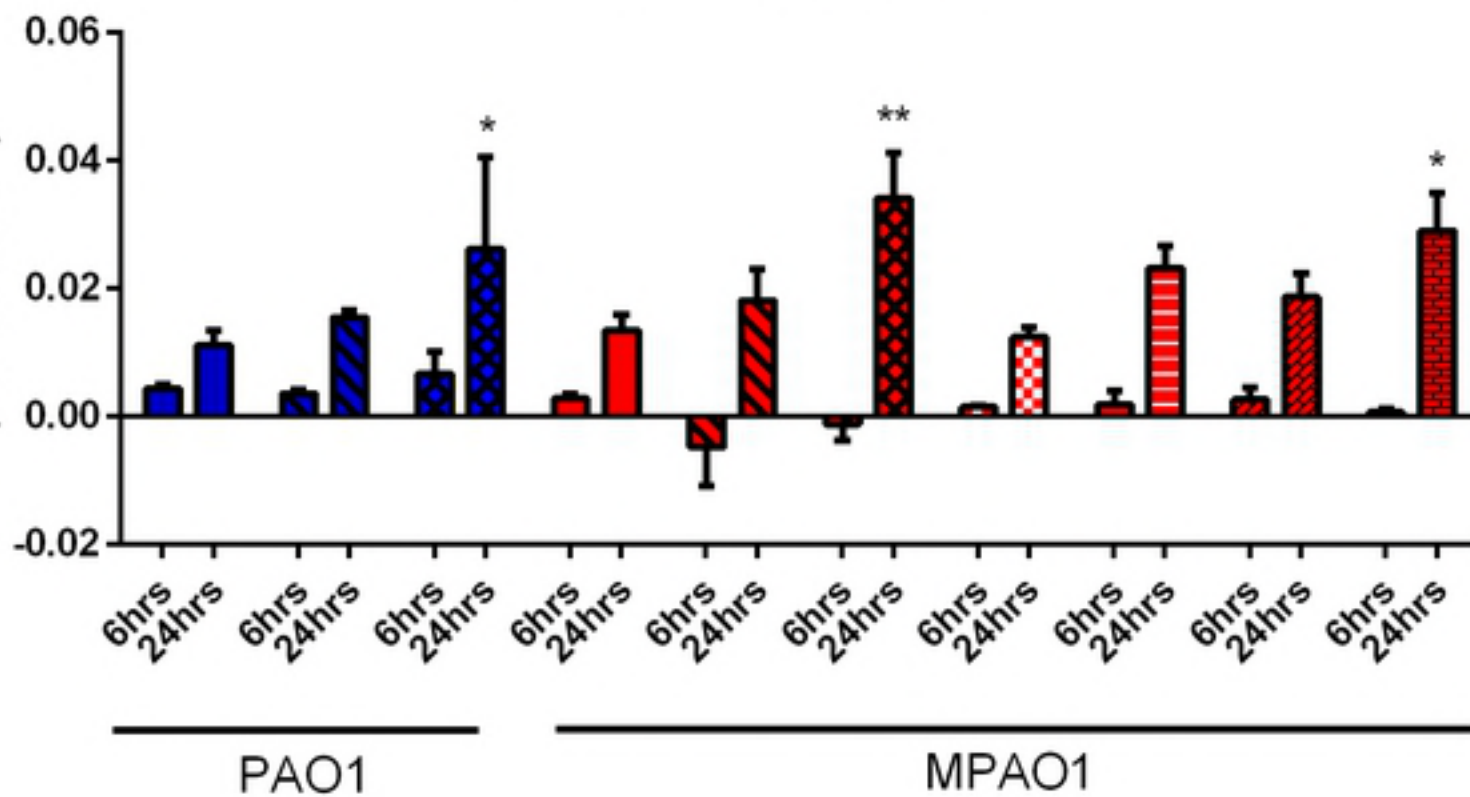

- PAO1 in LB Only
- PAO1 in 10% PAO1
- PAO1 in 10%  $\Delta 2794$
- MPAO1 in LB Only
- MPAO1 in 10% MPAO1
- MPAO1 in 10% PW5679
- MPAO1 in 10% PW6880
- MPAO1 in 10% PW3601
- MPAO1 in 10% PW3531
- MPAO1 in 10% PW3519
